# Supplementary material for: Seasonal recharge mechanism of the upper shallow groundwater in a long-term wastewater leakage and irrigation region of a river alluvium aquifer
Source: Copernicus journal article supplement (doi:10.5194/hess-2022-391), 2023-01-31
Supplement: Supplementary file 1 [file hess-2022-391-supplement.zip]

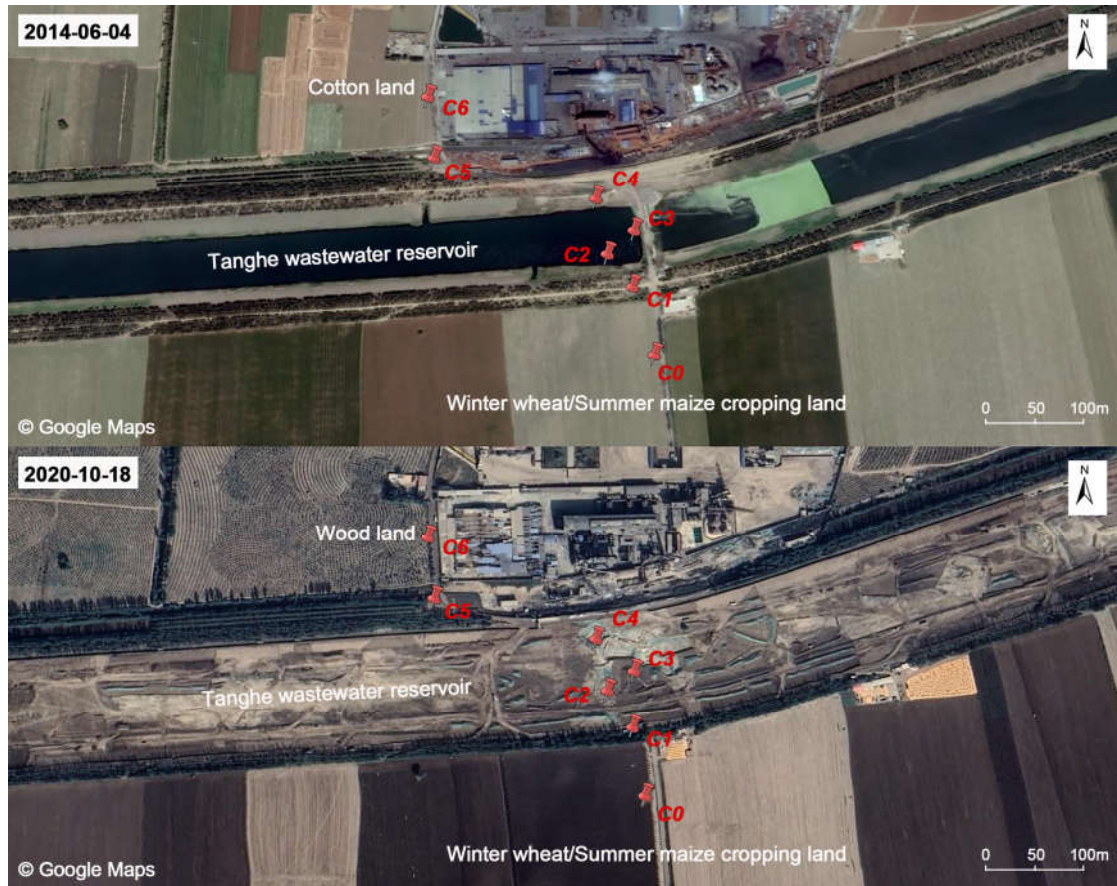

**Figure S1.** Variation of land use in the study area from 2014 to 2020.

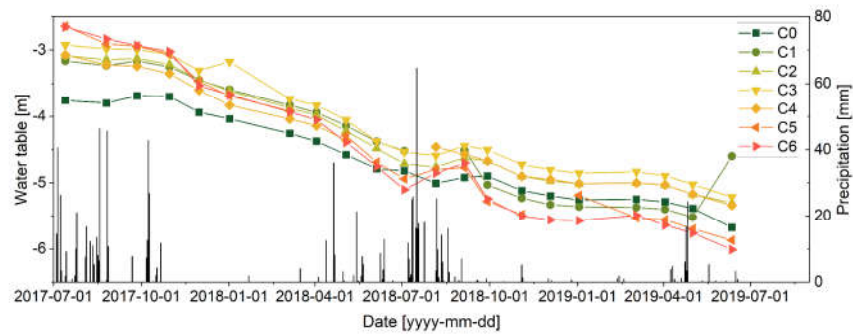

**Figure S2.** Monthly variations in water table levels for all monitoring wells from C6 to C0 along the transect and daily precipitation.

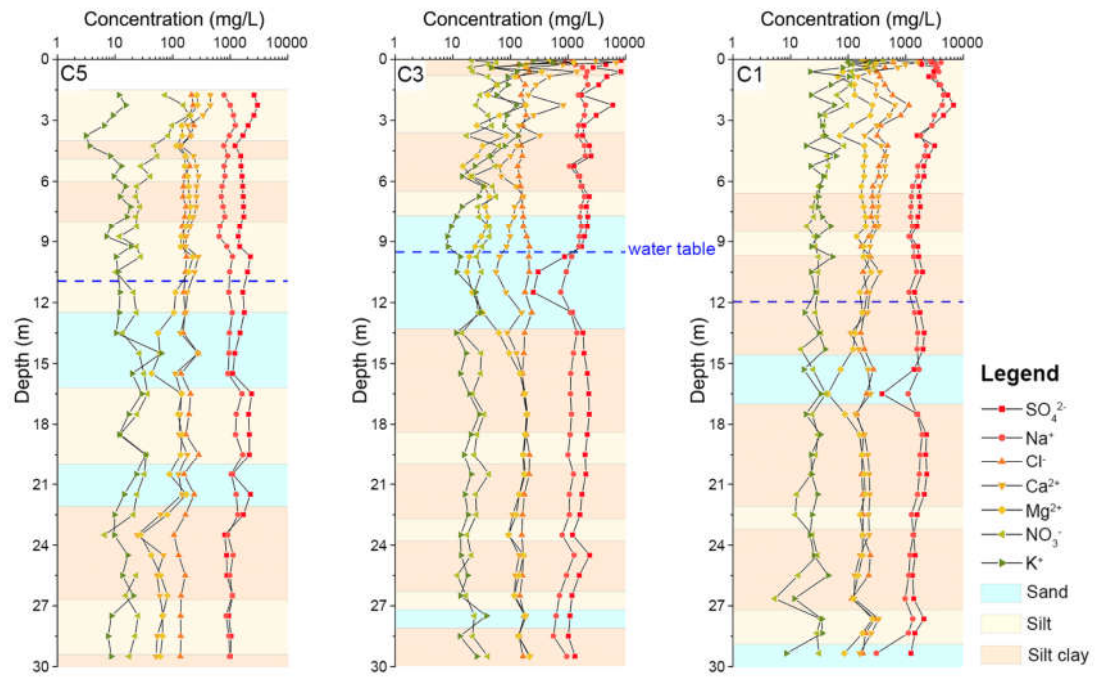

**Figure S3.** Distribution of major ions in soil porewater of profiles C1, C3, and C5.
