# Supplementary material for: Seasonal recharge mechanism of the upper shallow groundwater in a long-term wastewater leakage and irrigation region of a river alluvium aquifer
Source: Copernicus journal article supplement (doi:10.5194/hess-2022-391), 2023-01-31
Supplement: Supplementary file 2 [file hess-2022-391-supplement.zip]

Archive with 17 entries (16 files):
- Figures/
- Figures/Figure 1.tif
- Figures/Figure 10.tif
- Figures/Figure 11.tif
- Figures/Figure 3.tif
- Figures/Figure 4.tif
- Figures/Figure 5.tif
- Figures/Figure 6.tif
- Figures/Figure 7.tif
- Figures/Figure 8.tif
- Figures/Figure 9.tif
- Figures/Figure S1.tif
- Figures/Figure S2.tif
- Figures/Figure S3.tif
- Figures/Figure12.png
- Figures/Figure2.png
- Figures/Supplementary Interactive Plot.pdf
