# Supplementary figures and images for: Seasonal recharge mechanism of the upper shallow groundwater in a long-term wastewater leakage and irrigation region of a river alluvium aquifer
Source: Copernicus journal article supplement (doi:10.5194/hess-2022-391), 2023-01-31

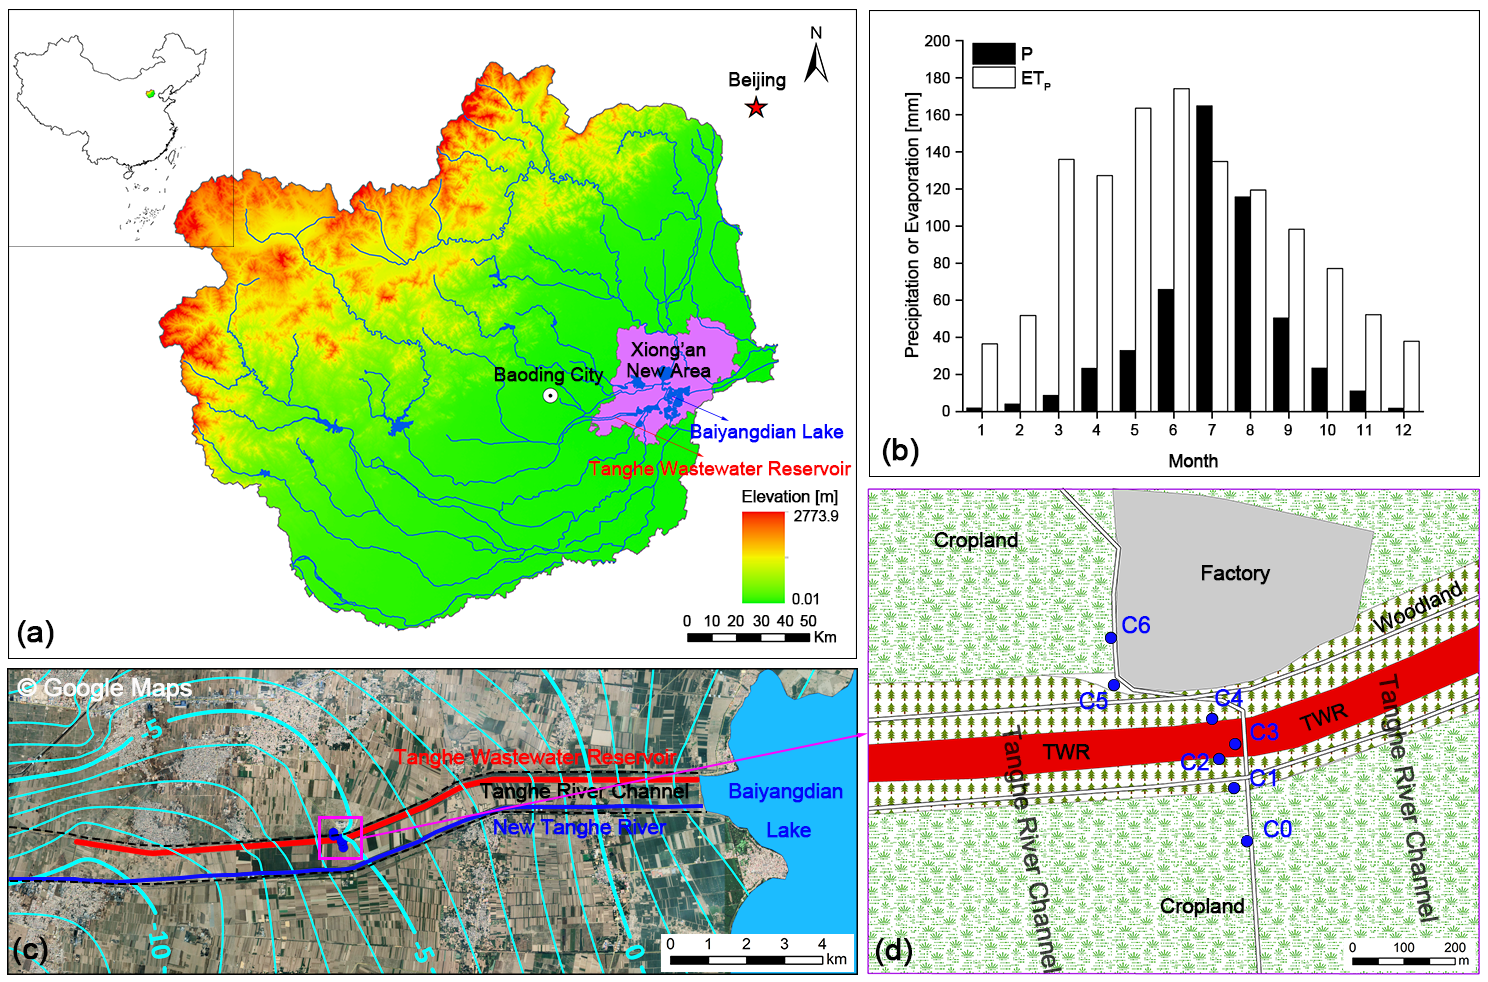

Supplement: Supplementary file 2 [file hess-2022-391-supplement.zip › Figures/Figure 1.tif]

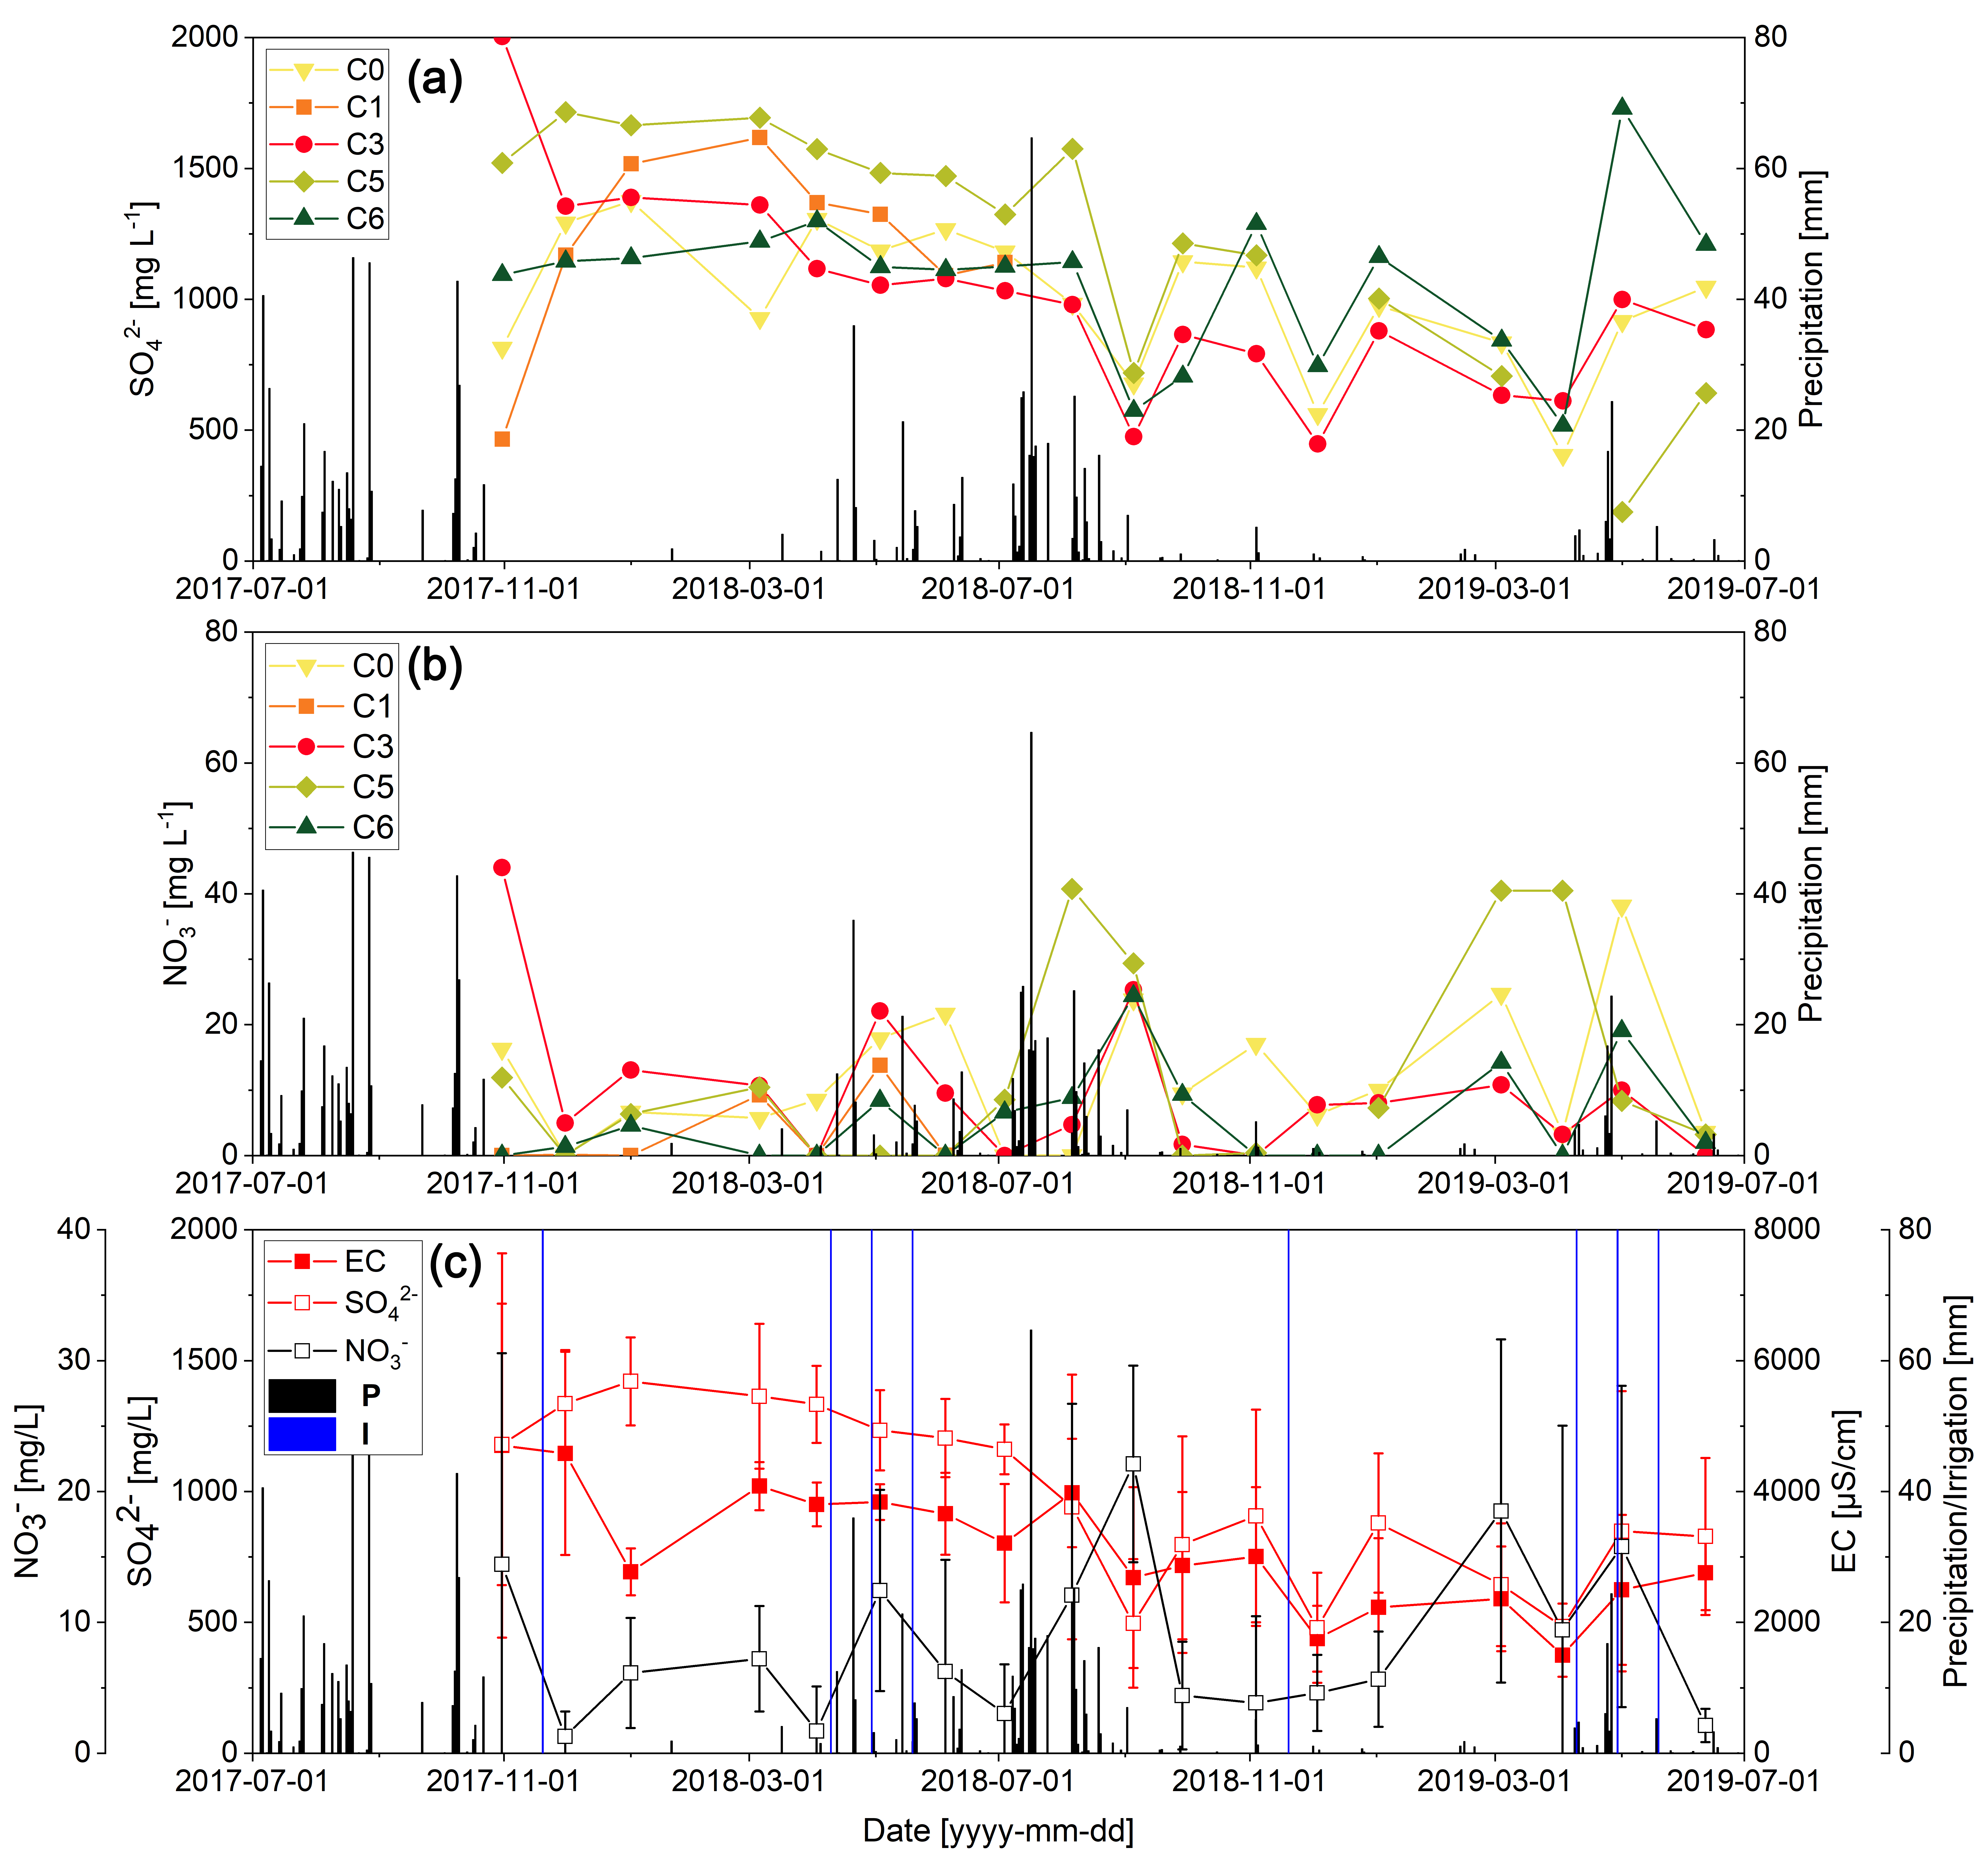

Supplement: Supplementary file 2 [file hess-2022-391-supplement.zip › Figures/Figure 10.tif]

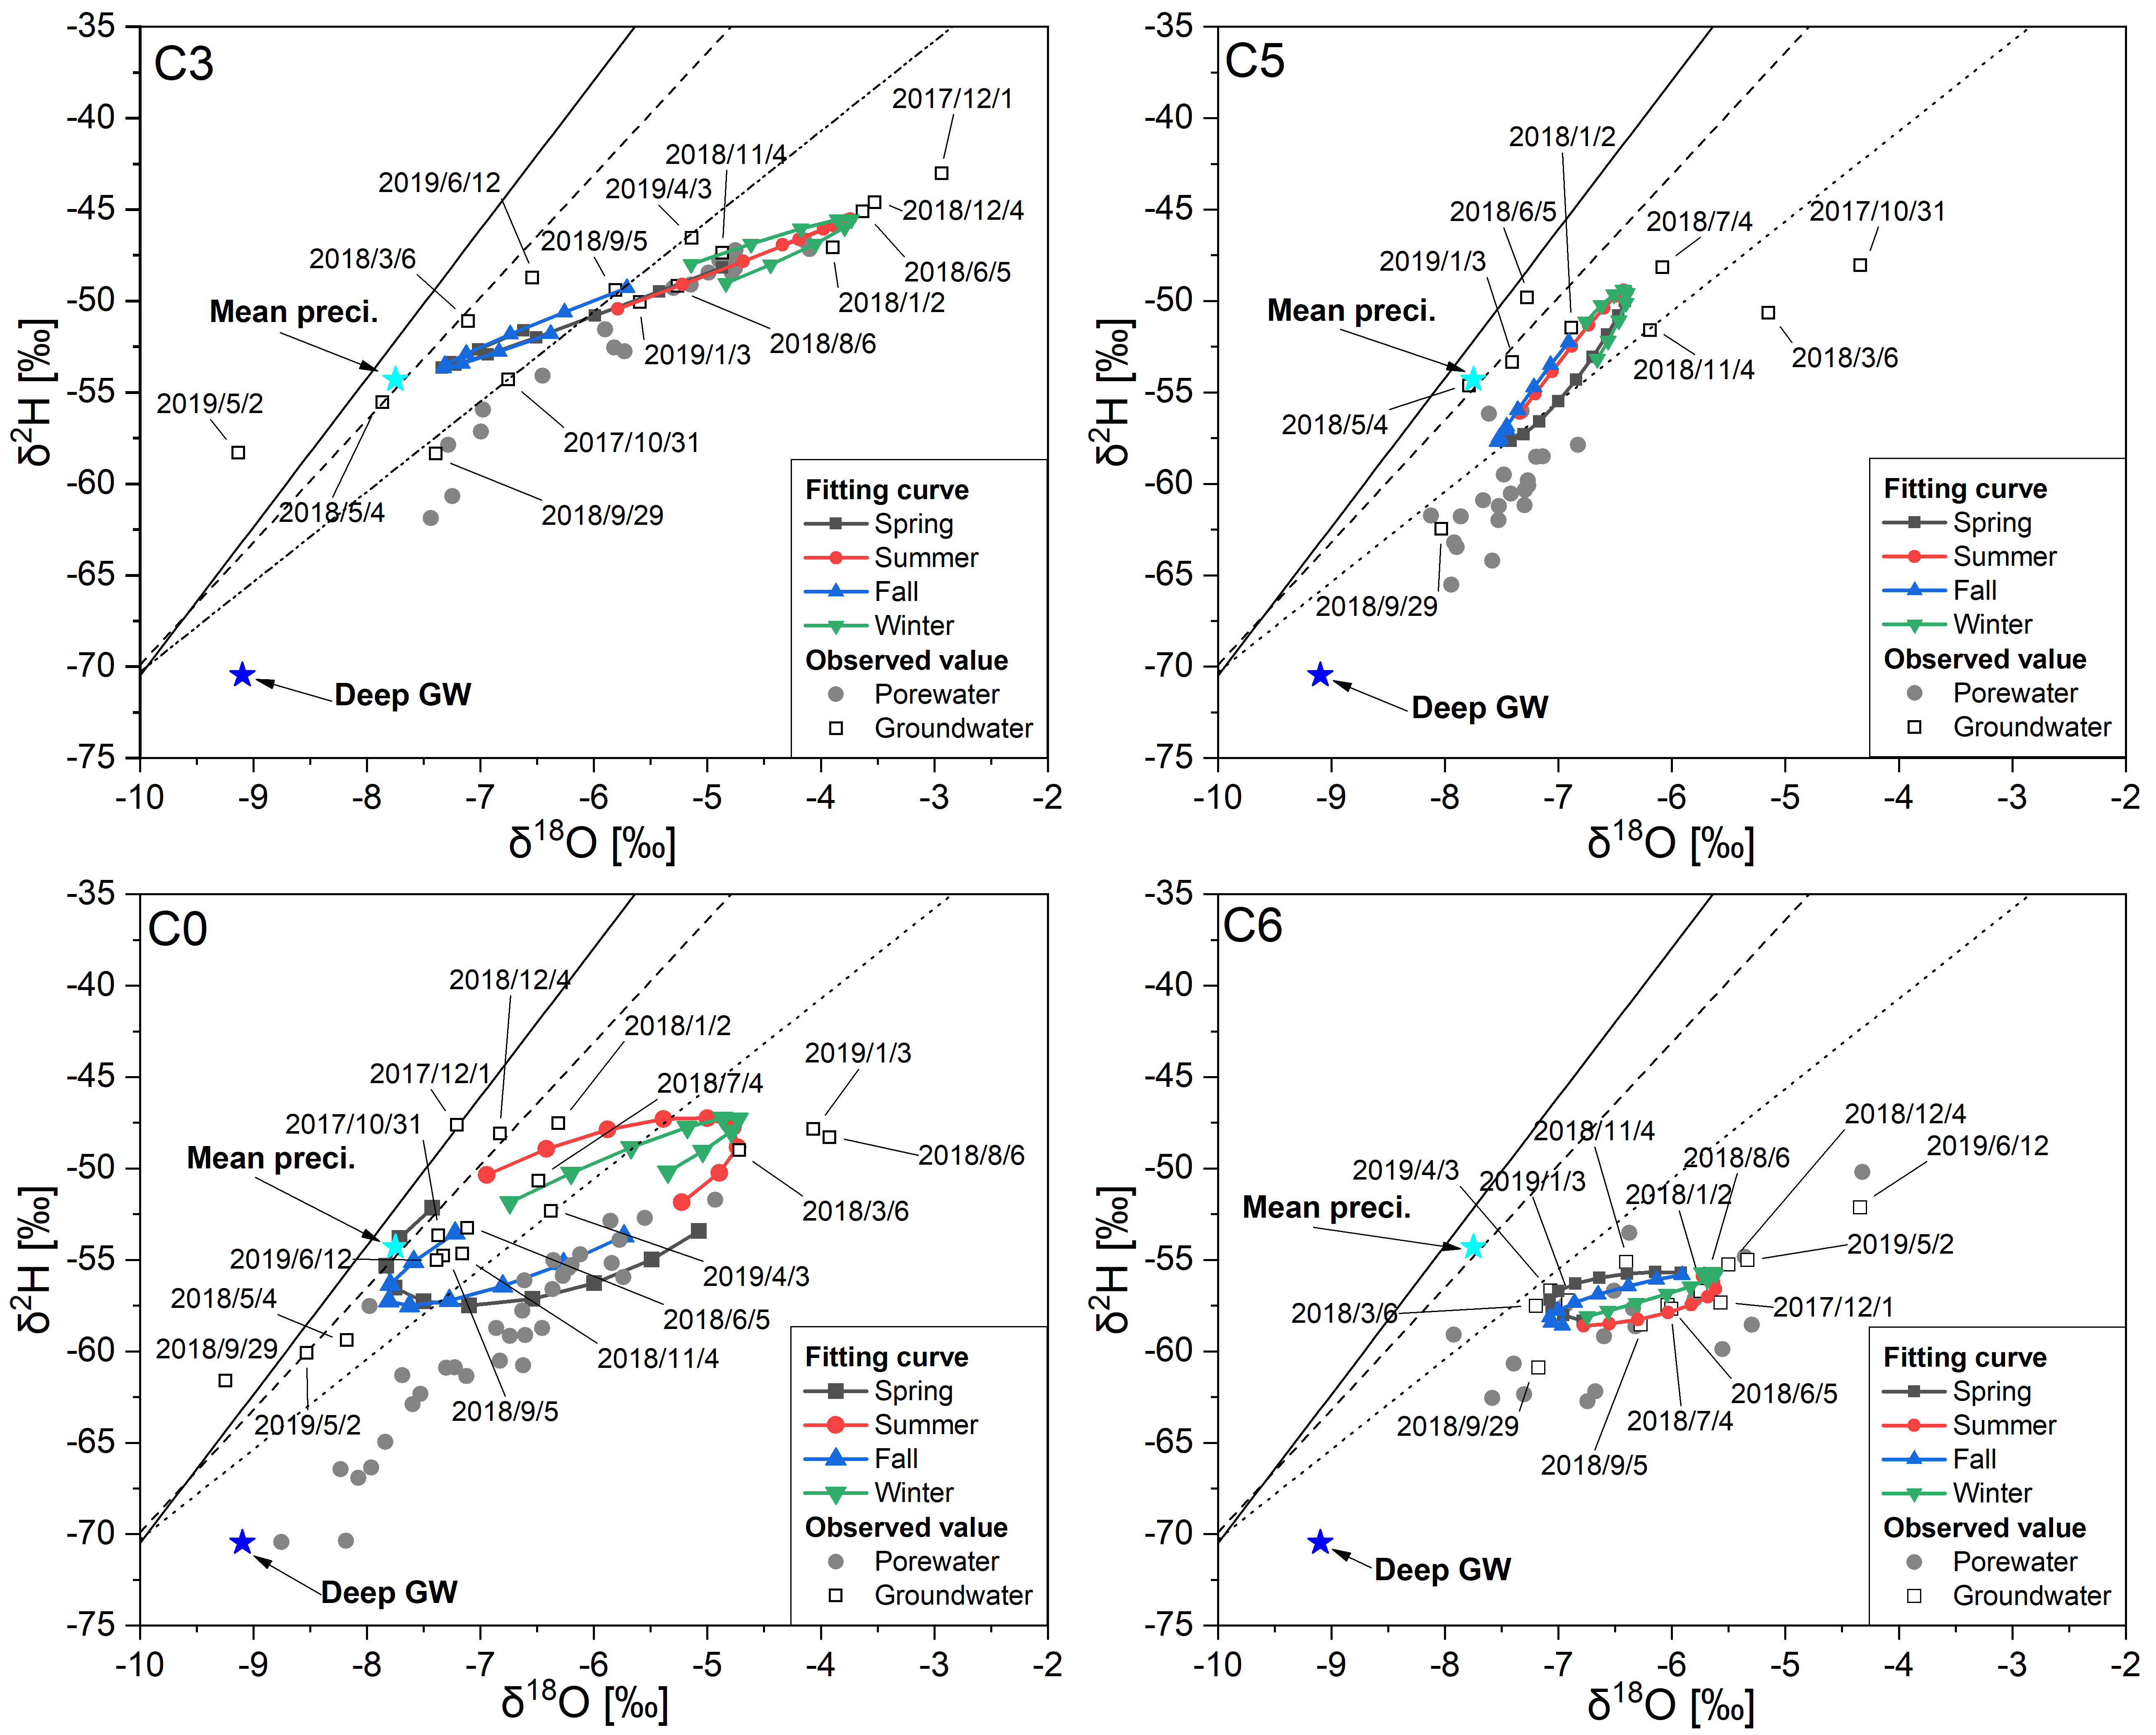

Supplement: Supplementary file 2 [file hess-2022-391-supplement.zip › Figures/Figure 11.tif]

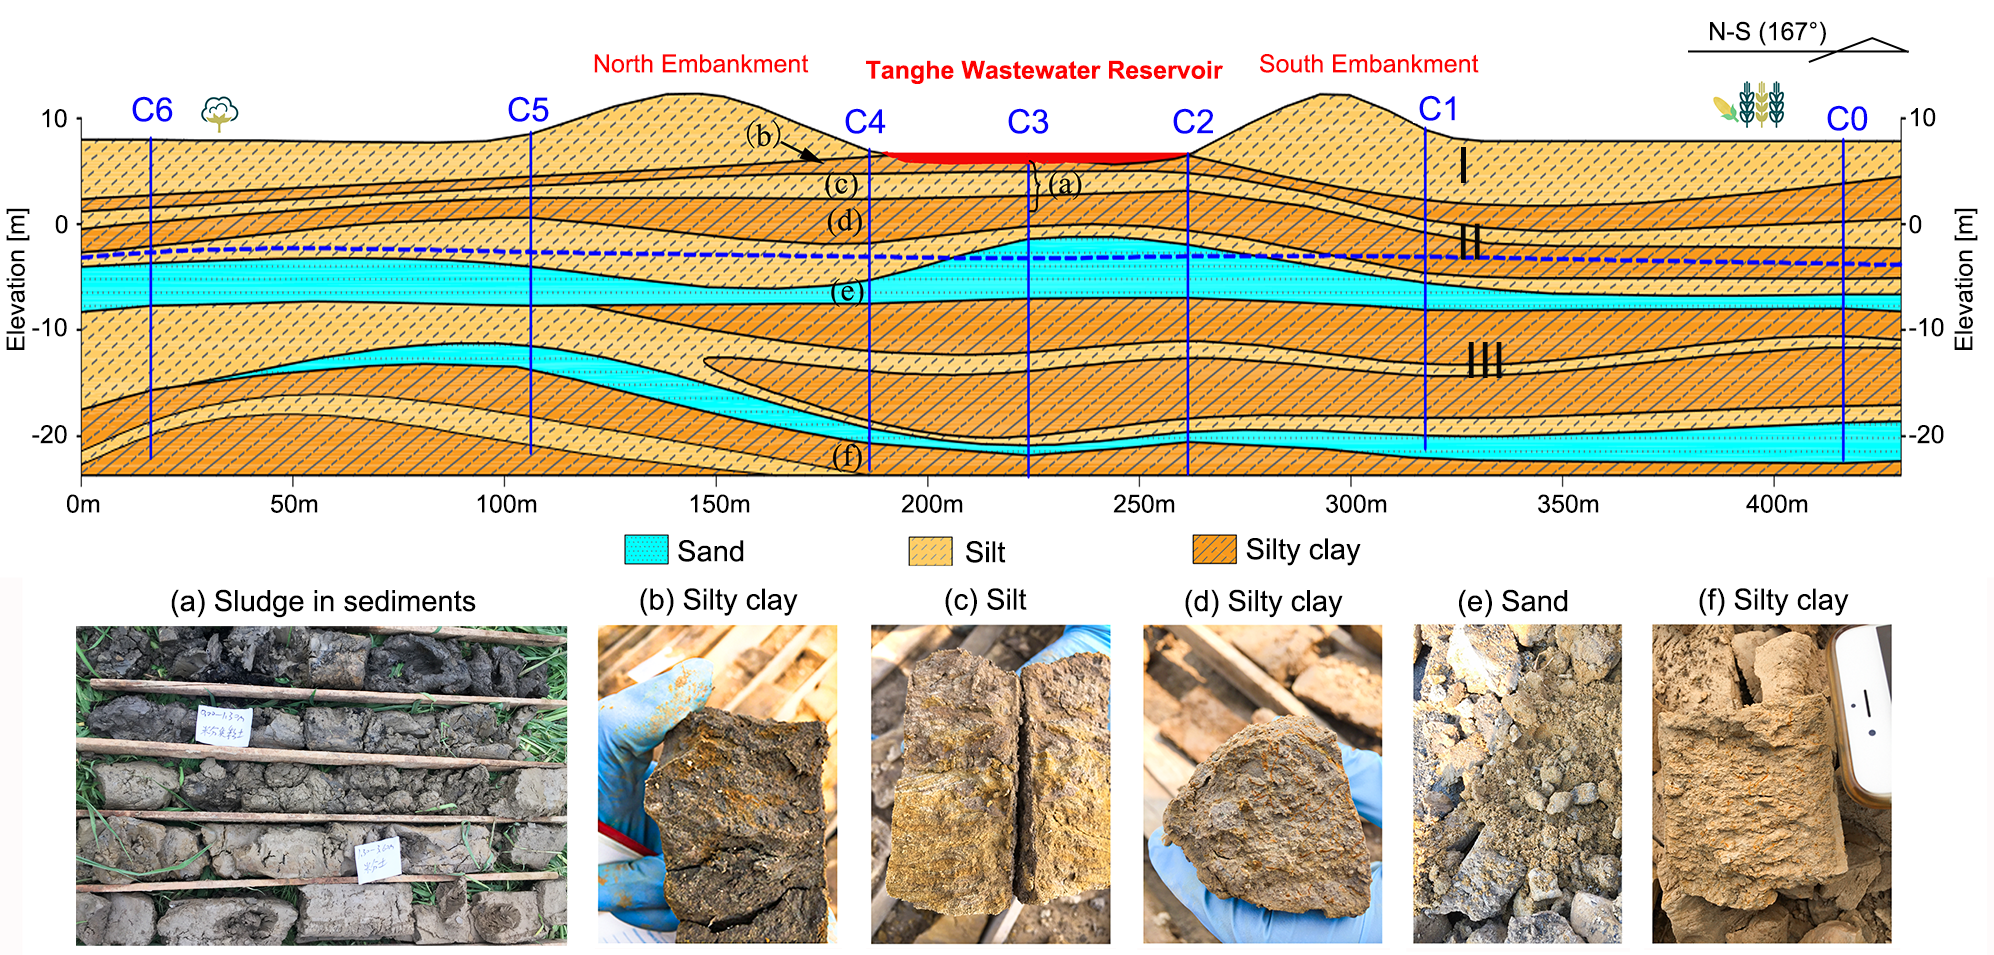

Supplement: Supplementary file 2 [file hess-2022-391-supplement.zip › Figures/Figure 3.tif]

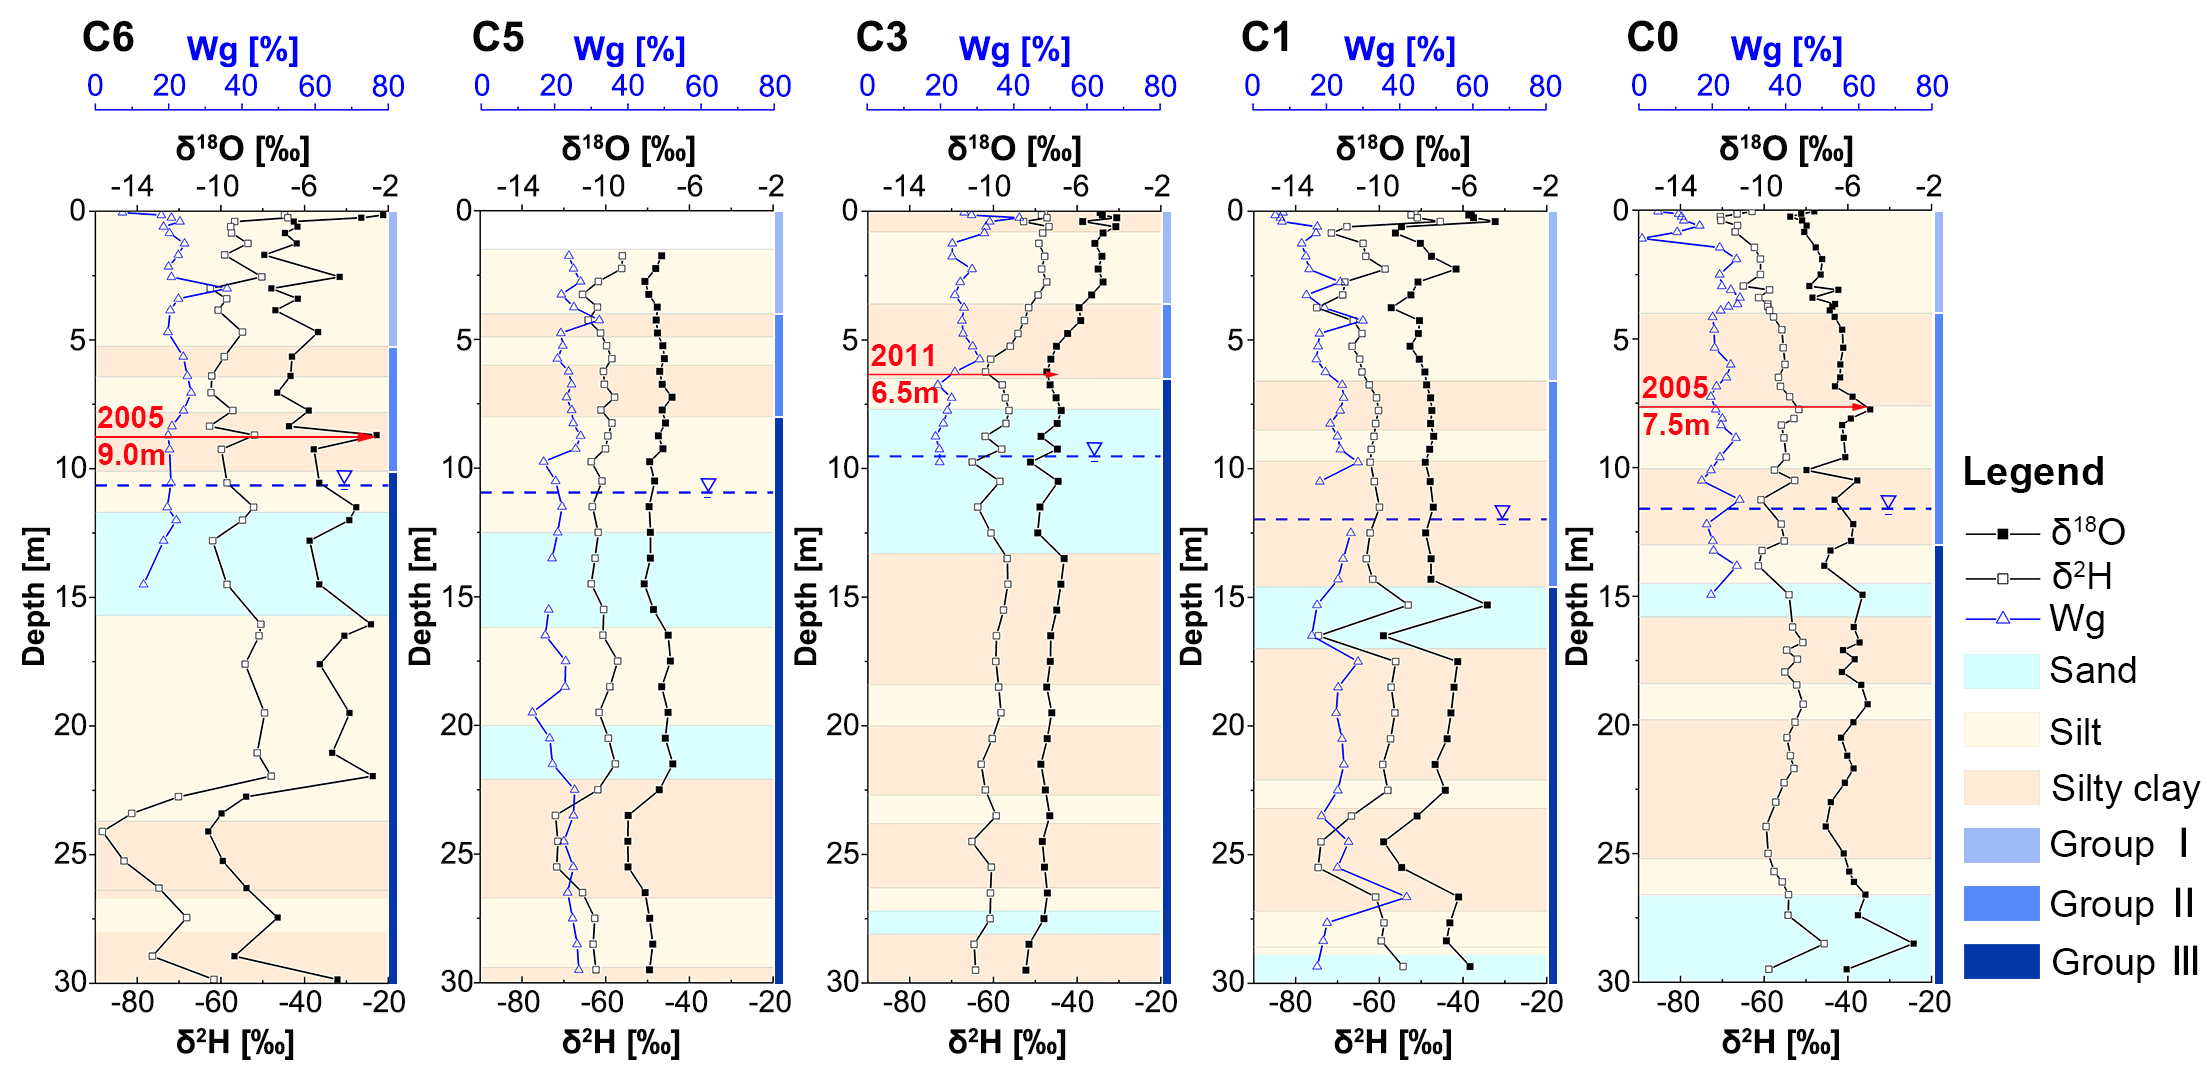

Supplement: Supplementary file 2 [file hess-2022-391-supplement.zip › Figures/Figure 5.tif]

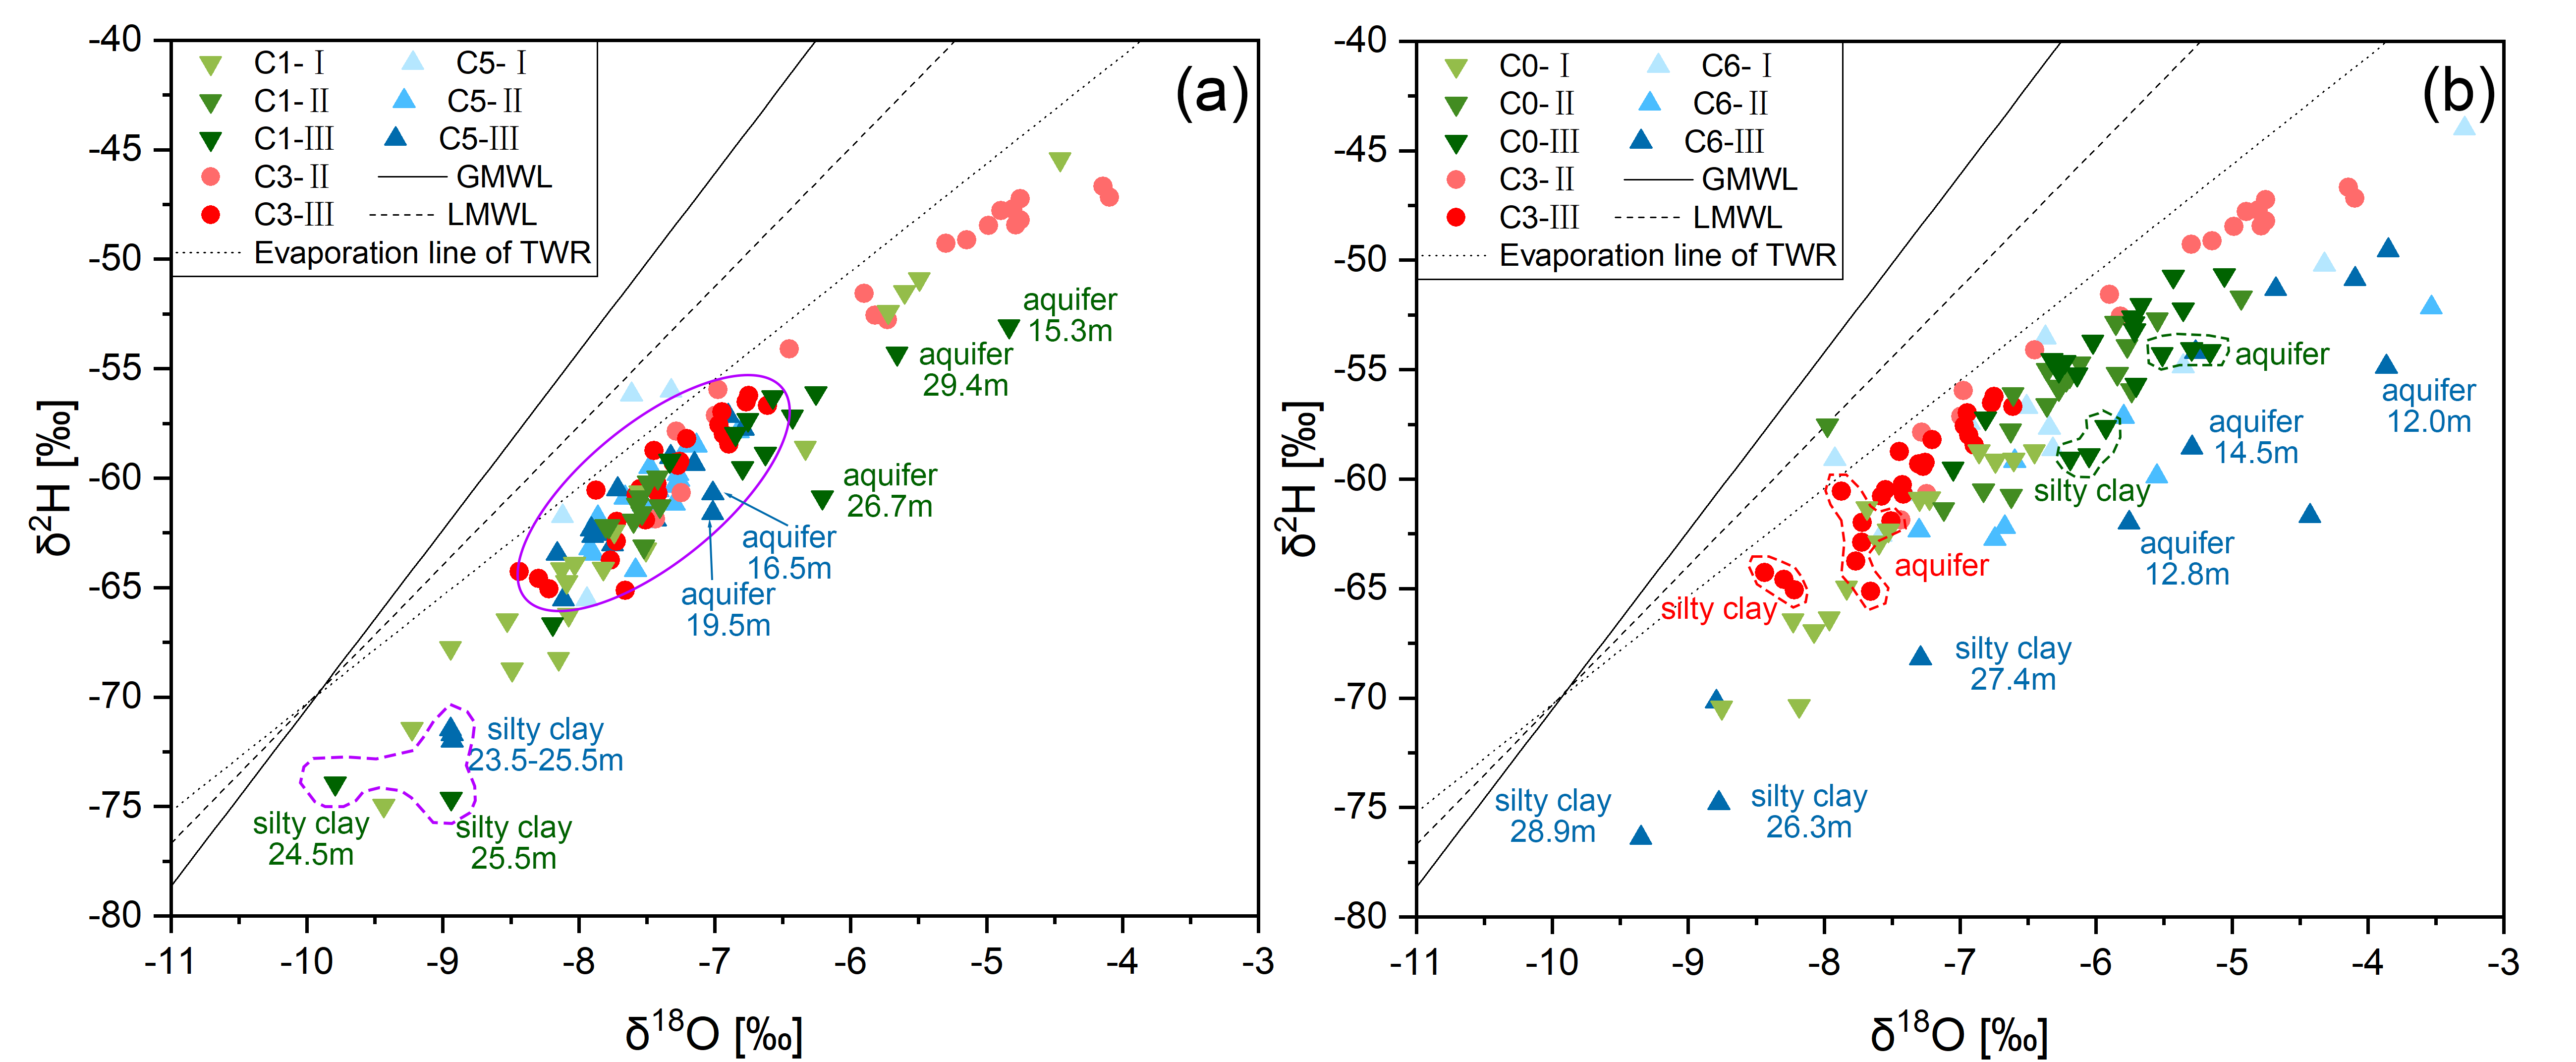

Supplement: Supplementary file 2 [file hess-2022-391-supplement.zip › Figures/Figure 6.tif]

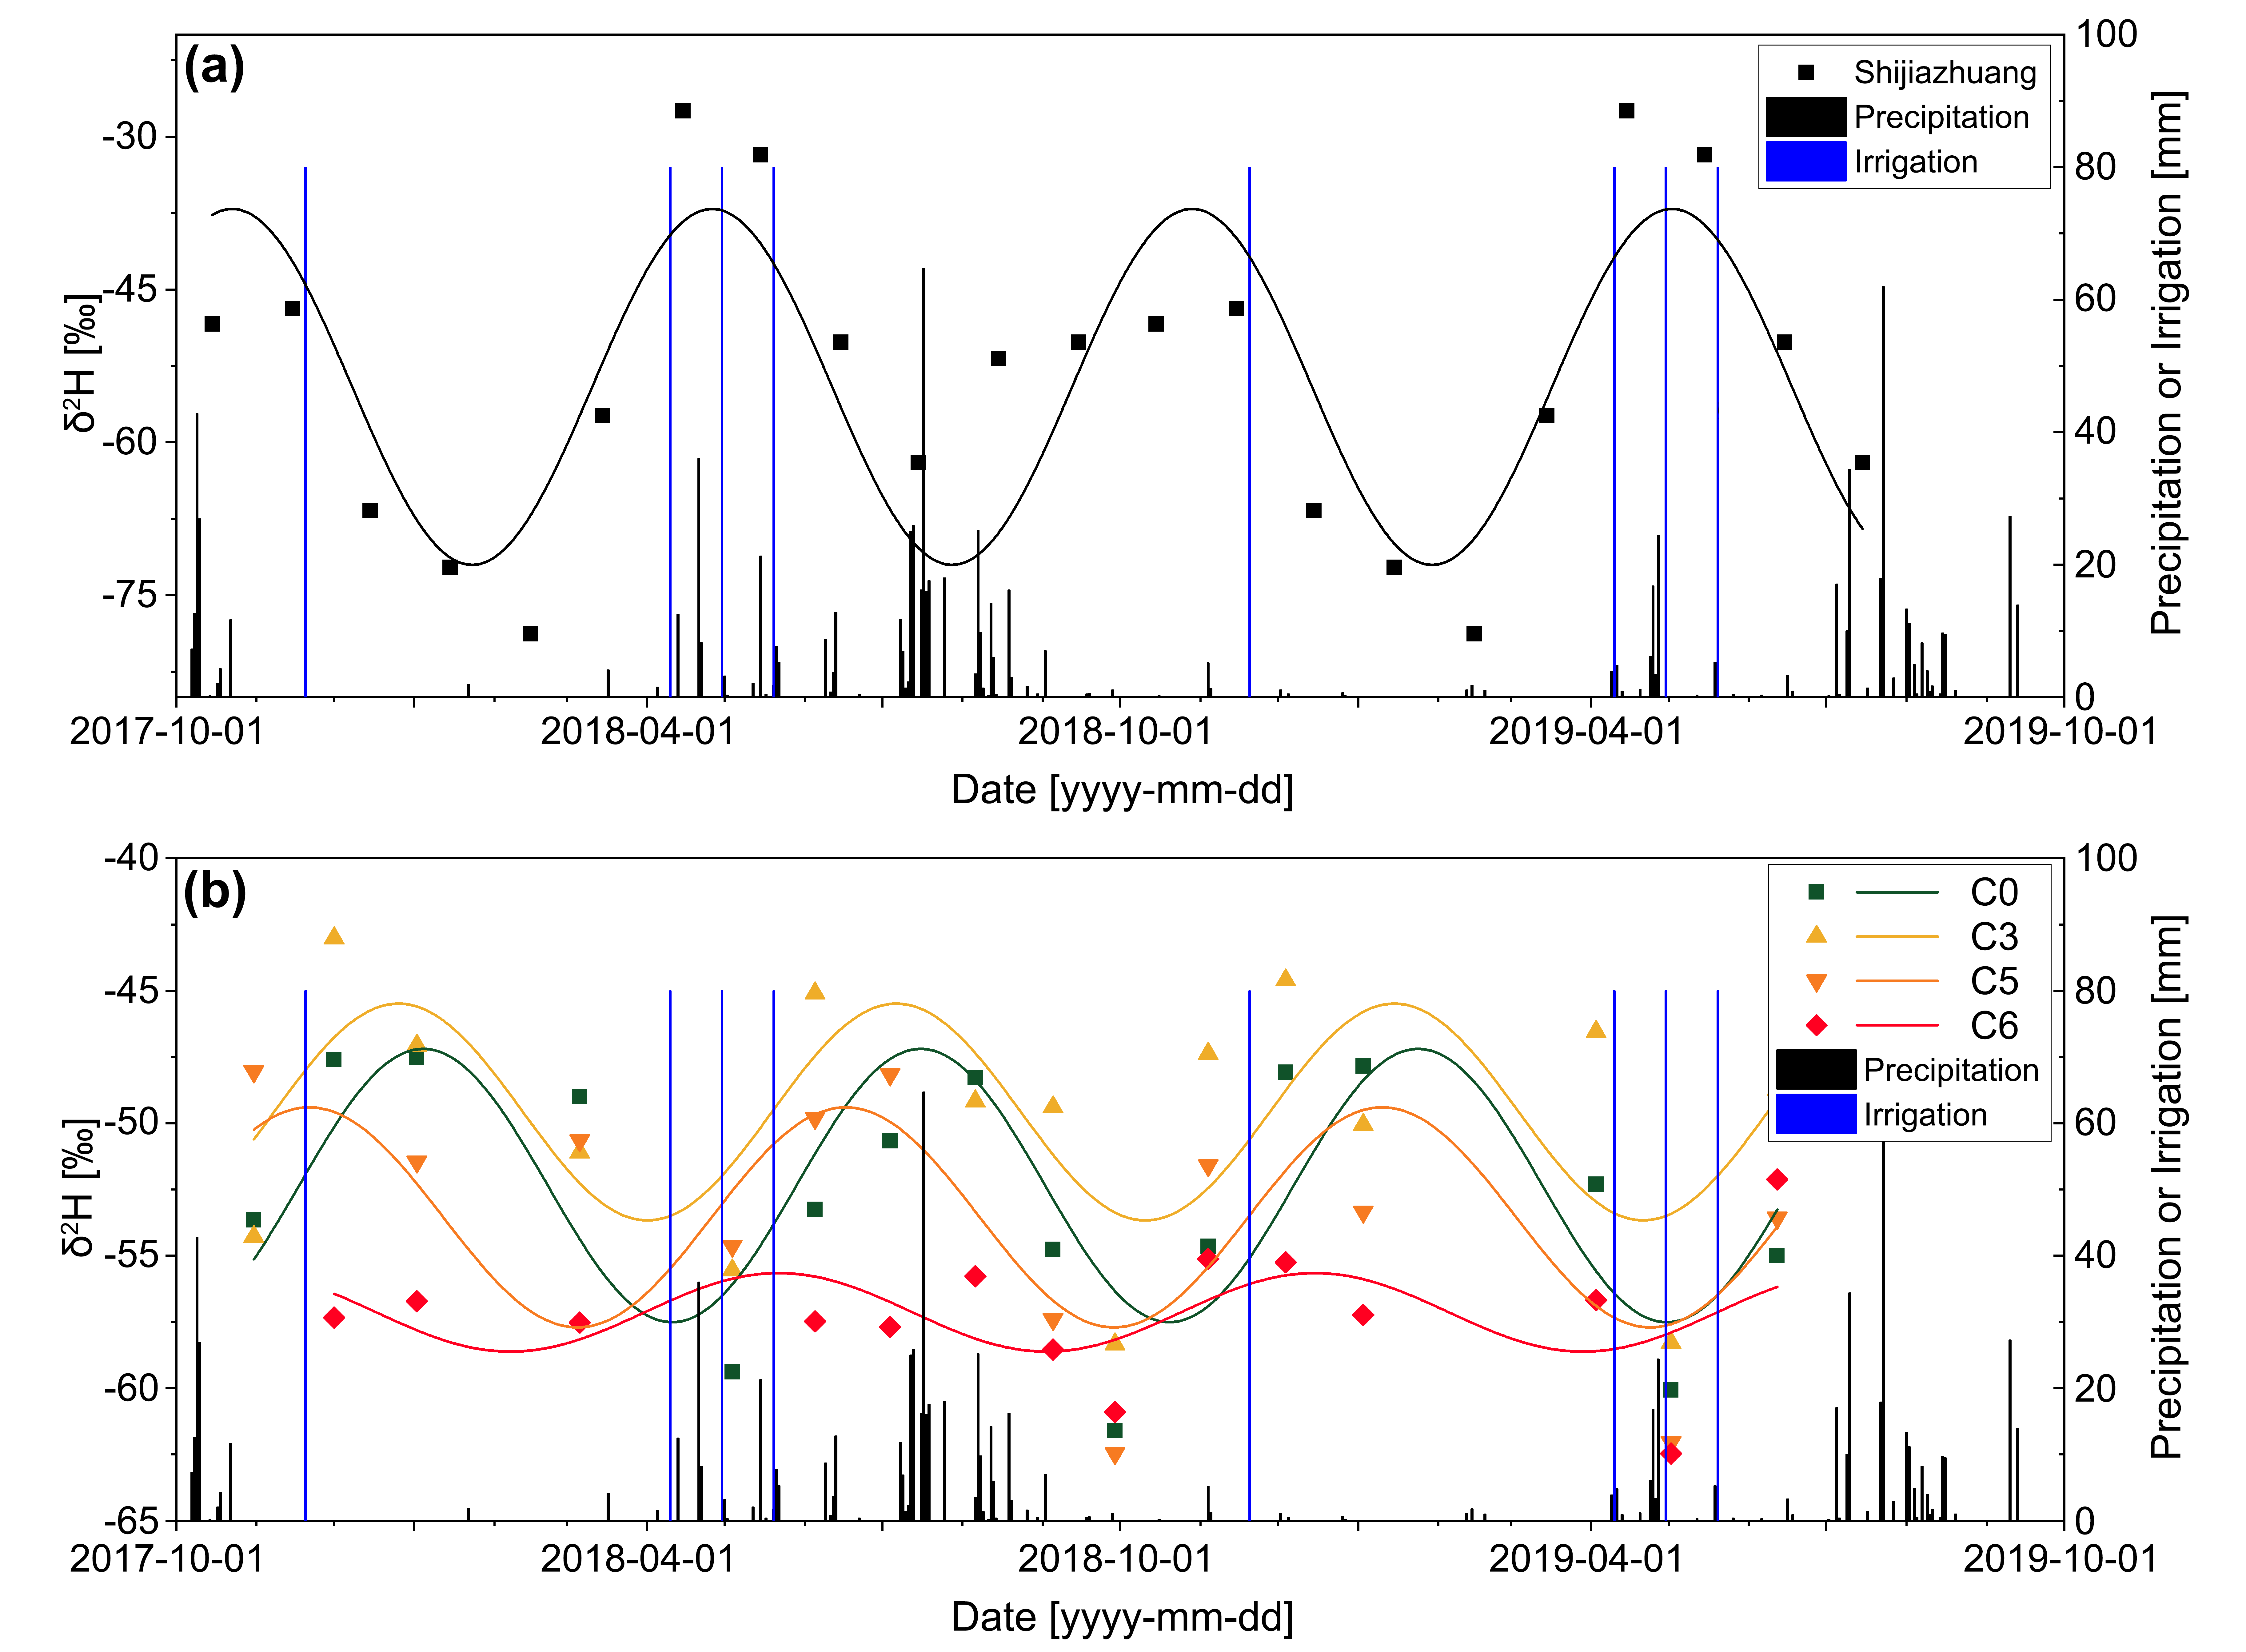

Supplement: Supplementary file 2 [file hess-2022-391-supplement.zip › Figures/Figure 7.tif]

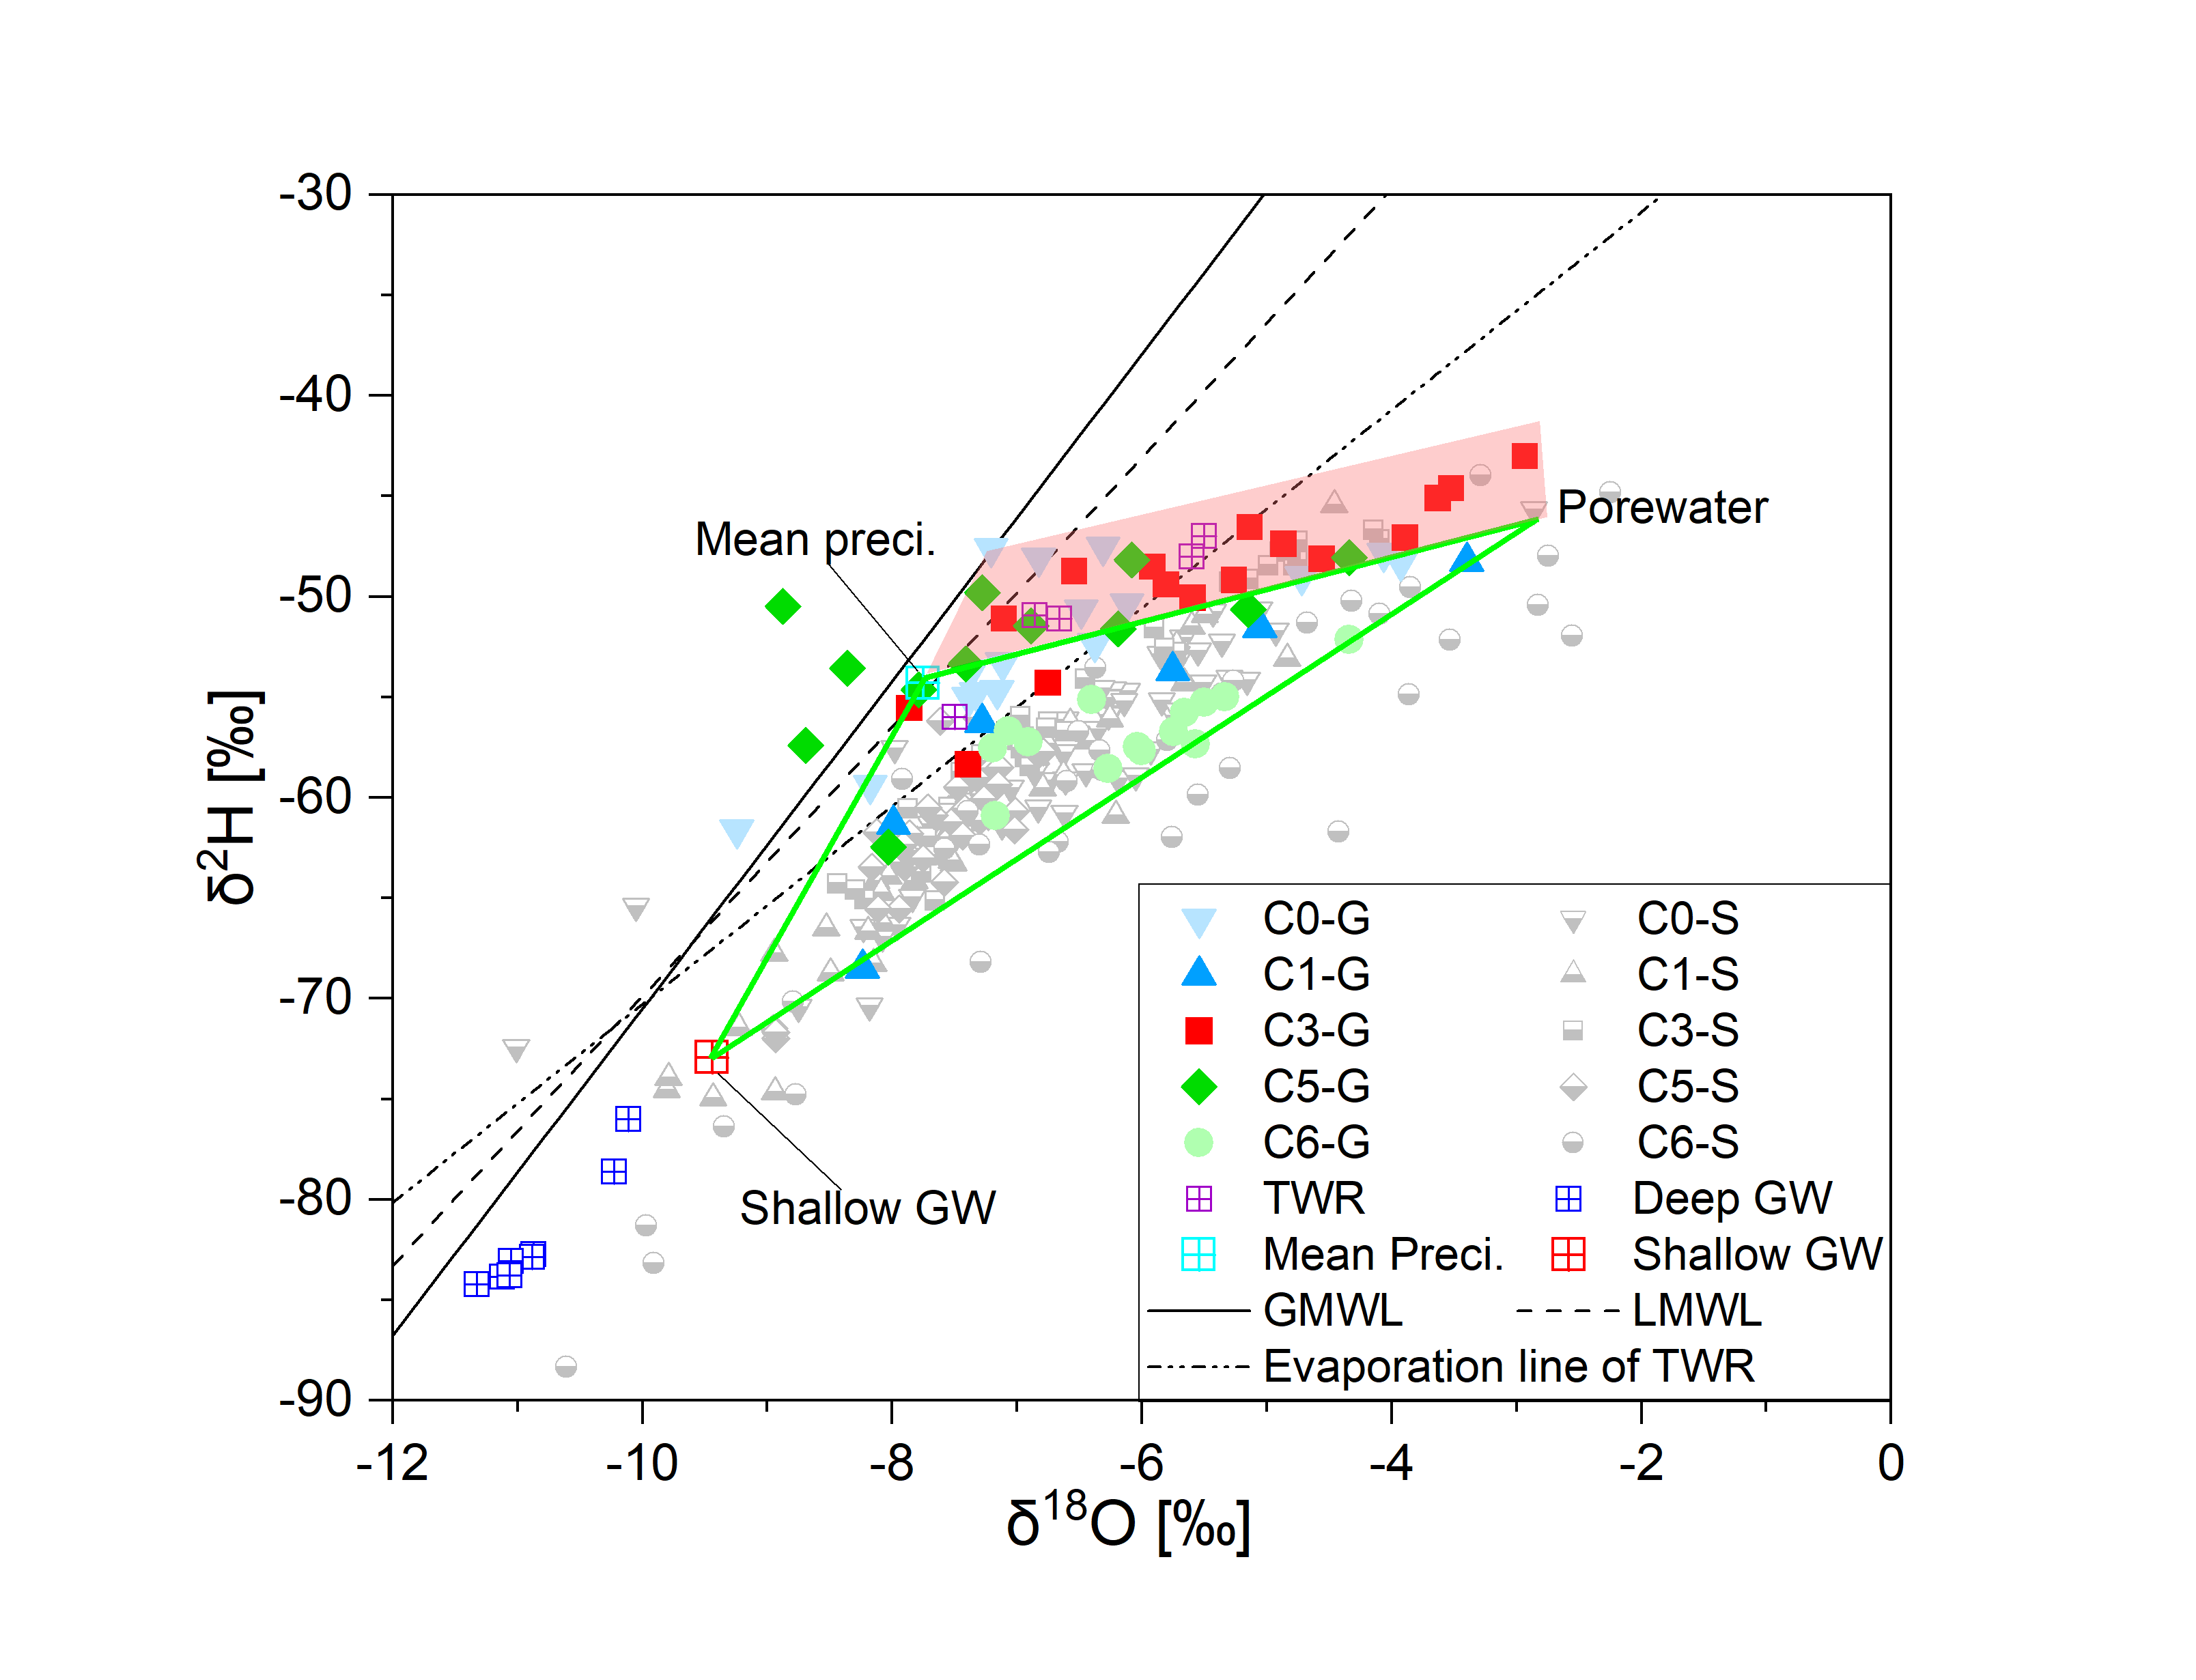

Supplement: Supplementary file 2 [file hess-2022-391-supplement.zip › Figures/Figure 8.tif]

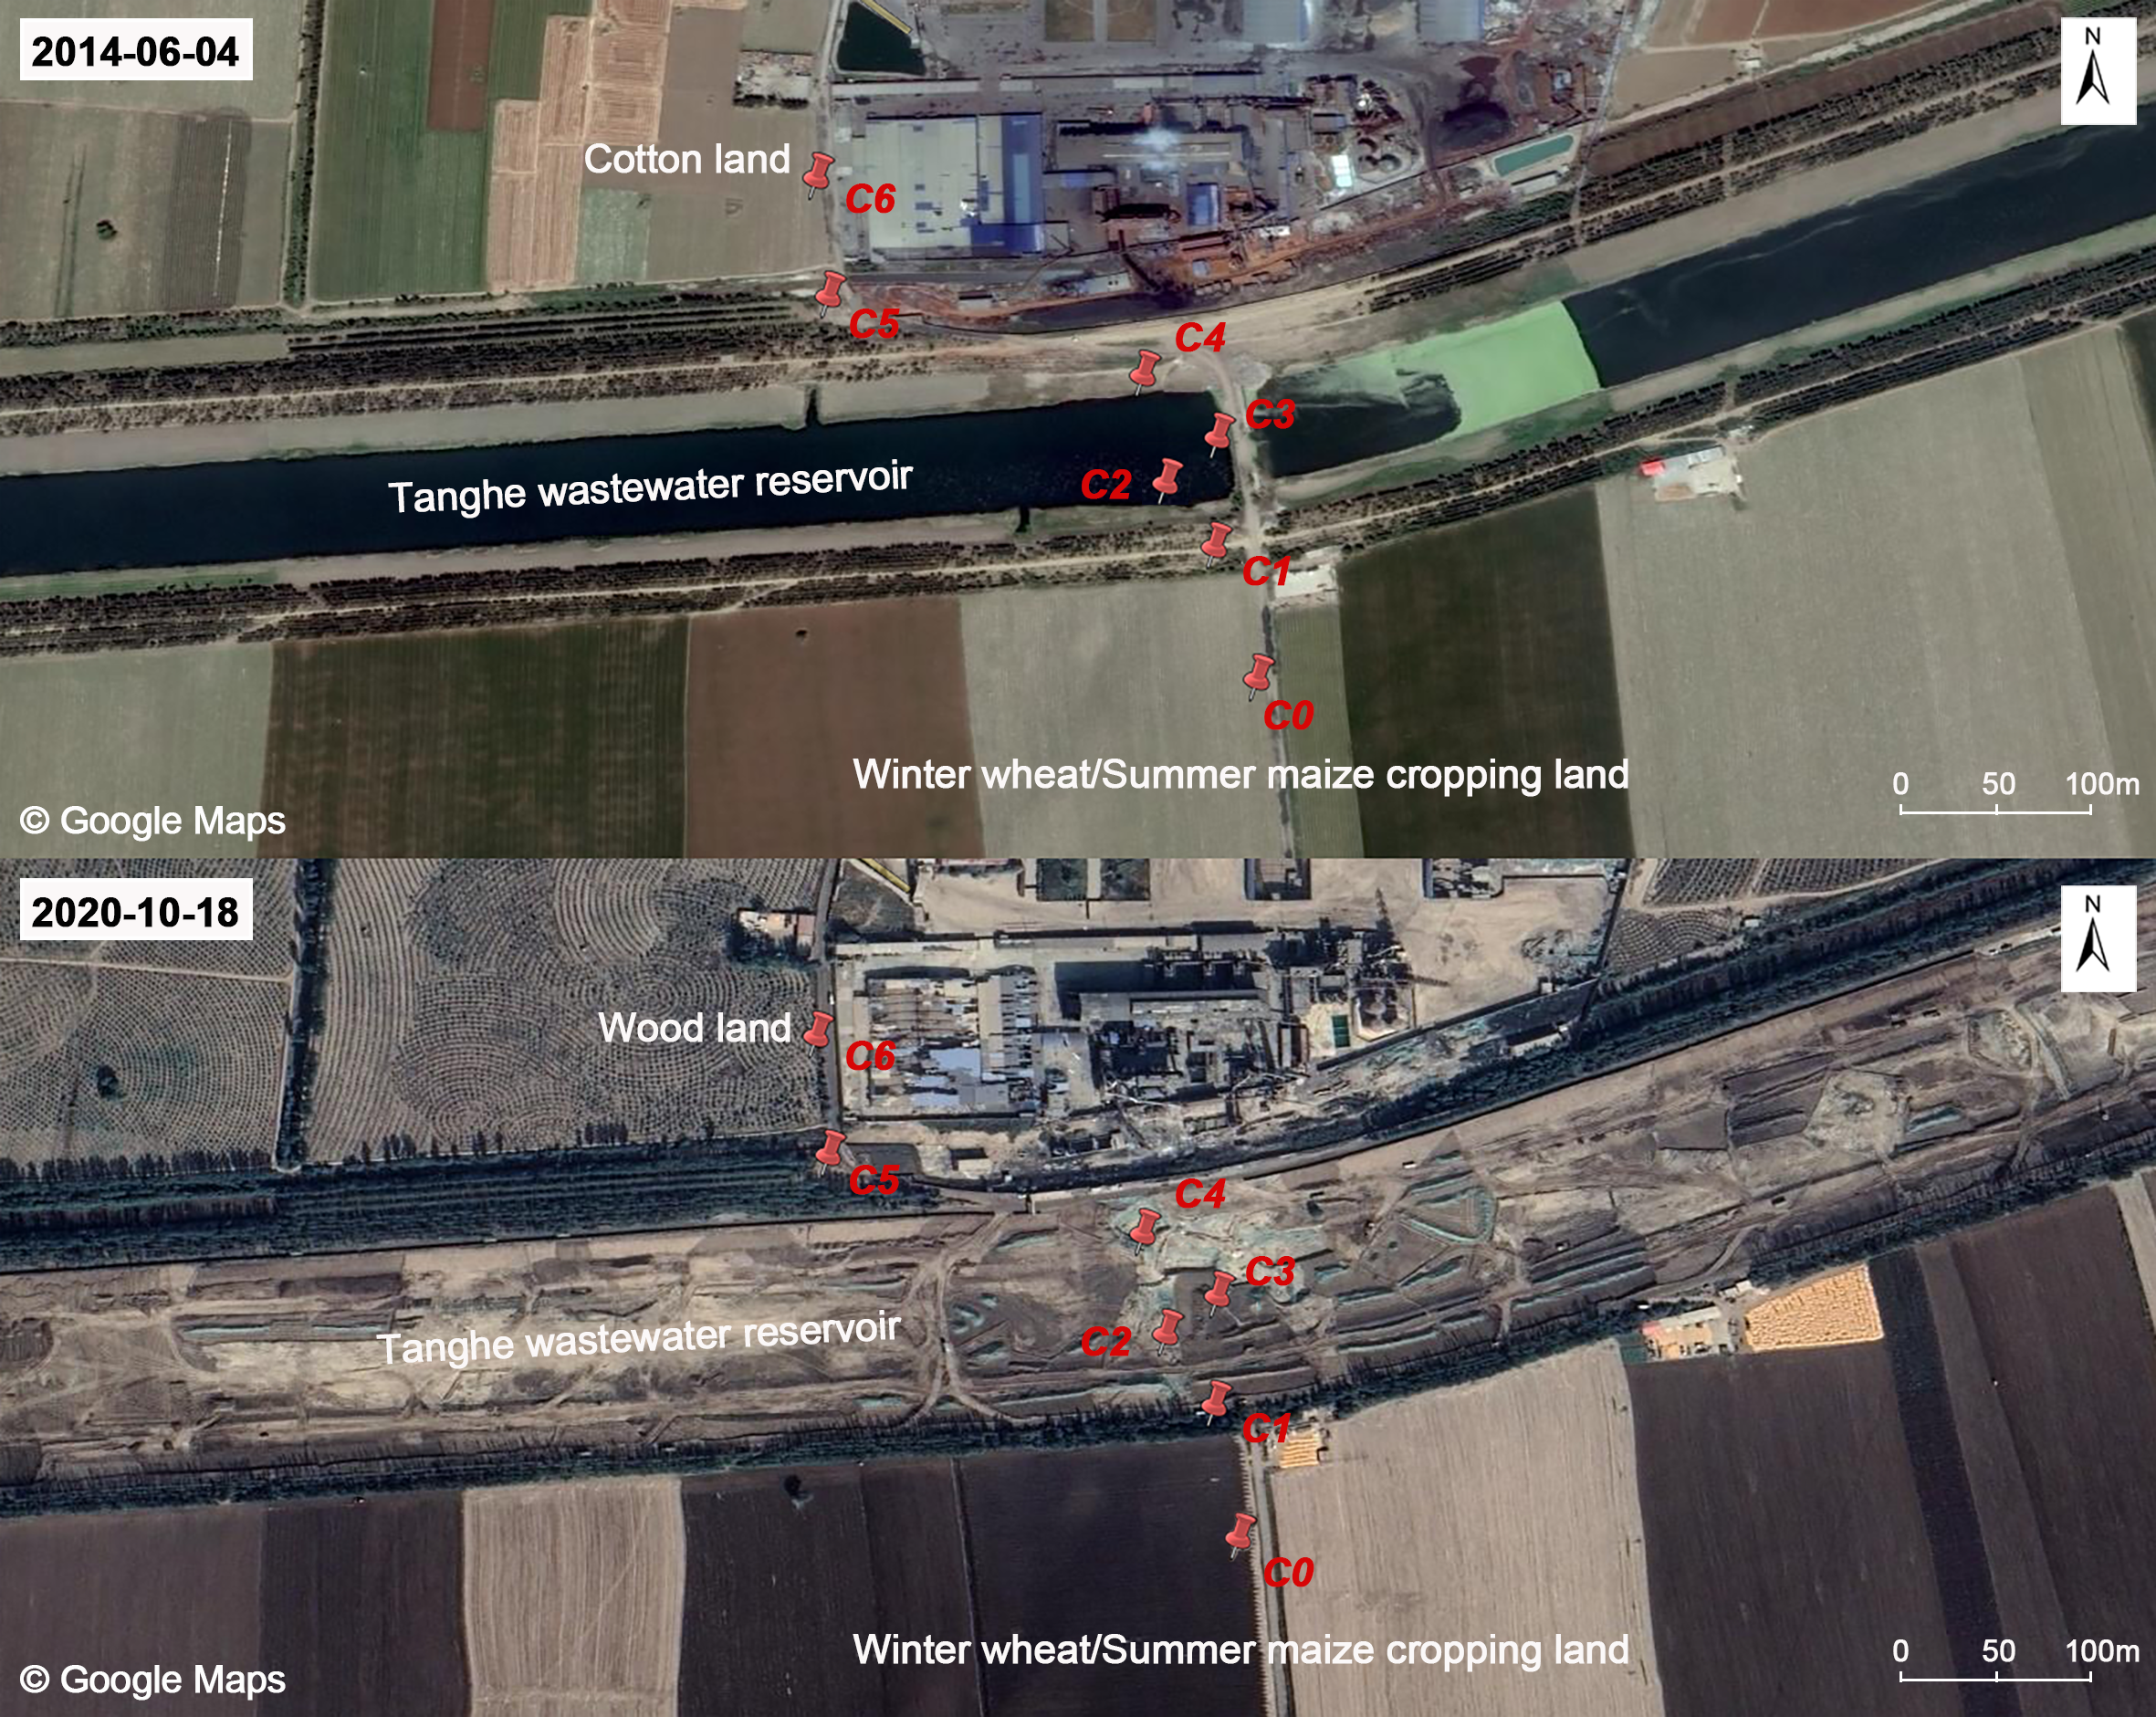

Supplement: Supplementary file 2 [file hess-2022-391-supplement.zip › Figures/Figure S1.tif]

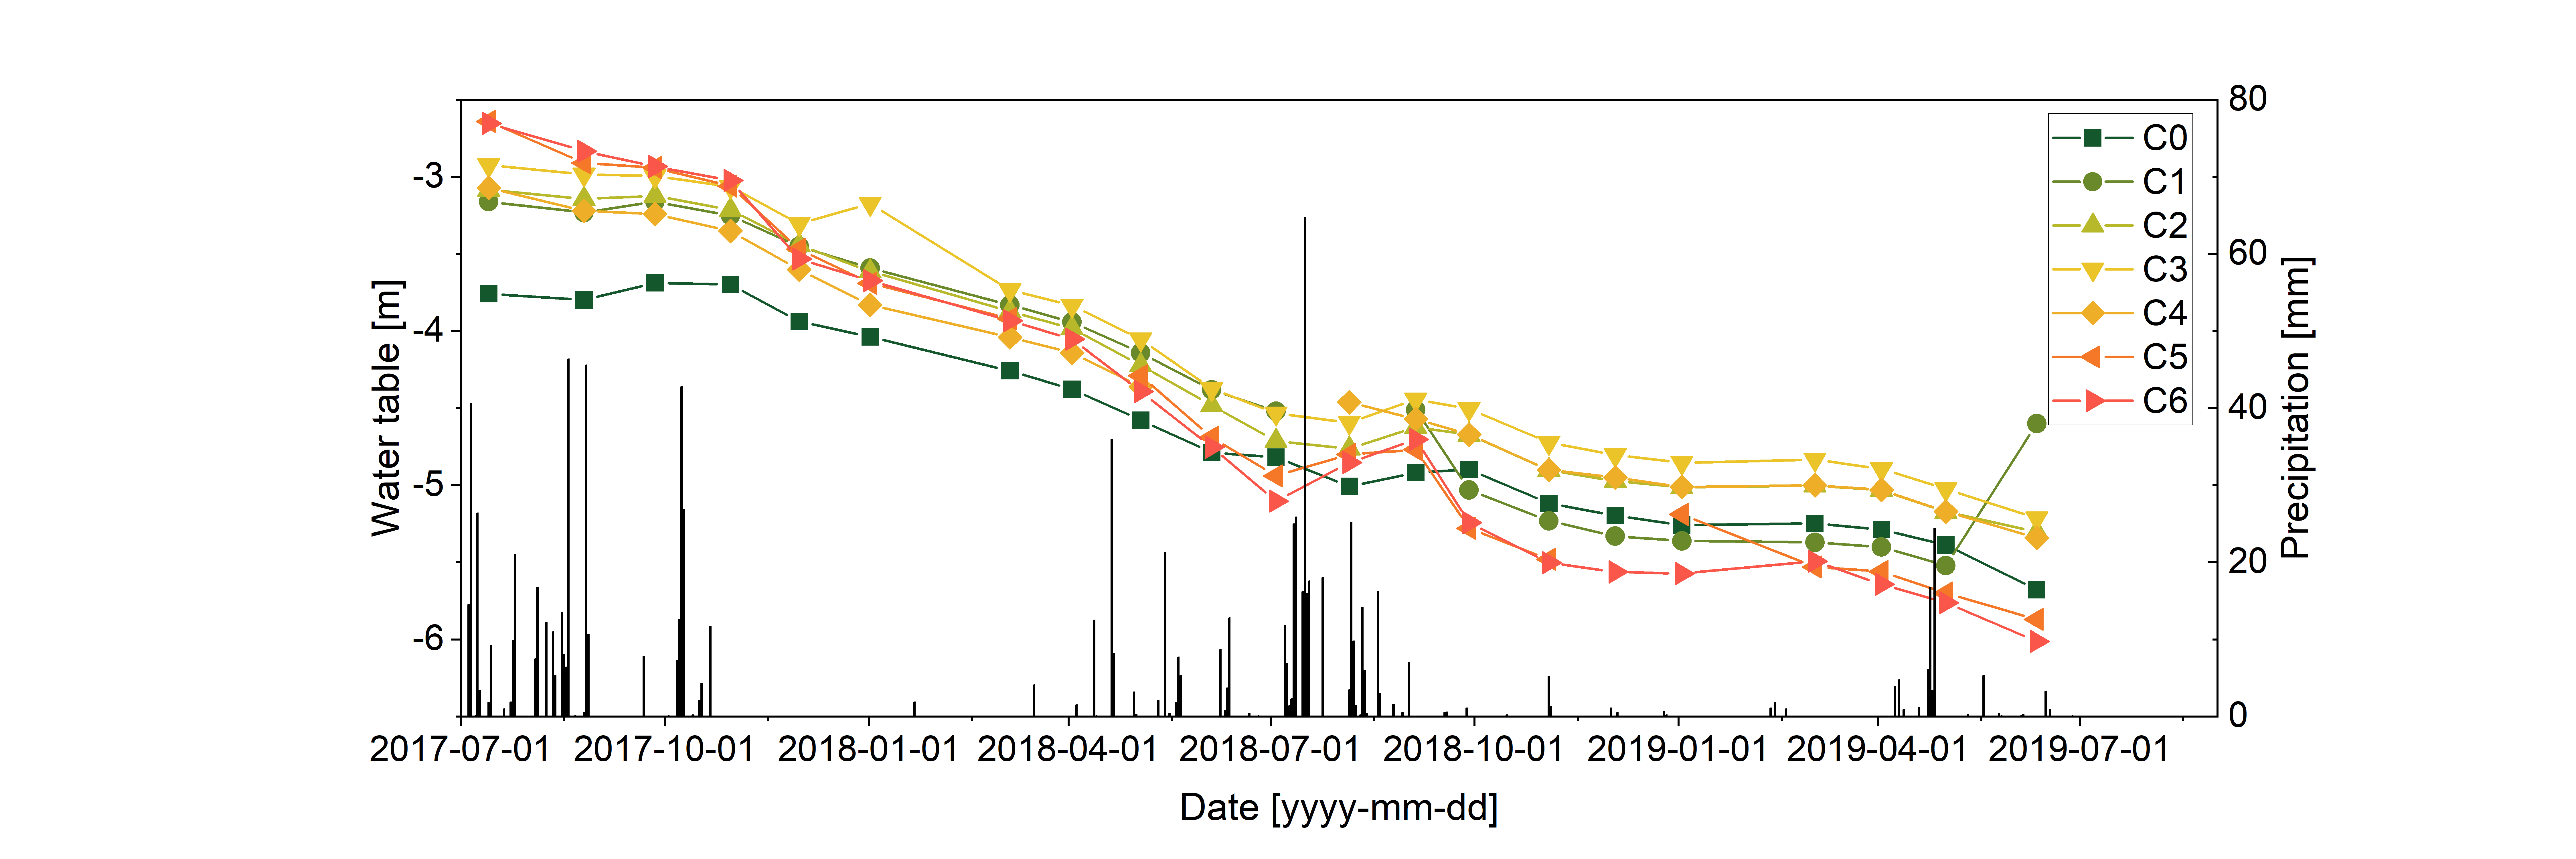

Supplement: Supplementary file 2 [file hess-2022-391-supplement.zip › Figures/Figure S2.tif]

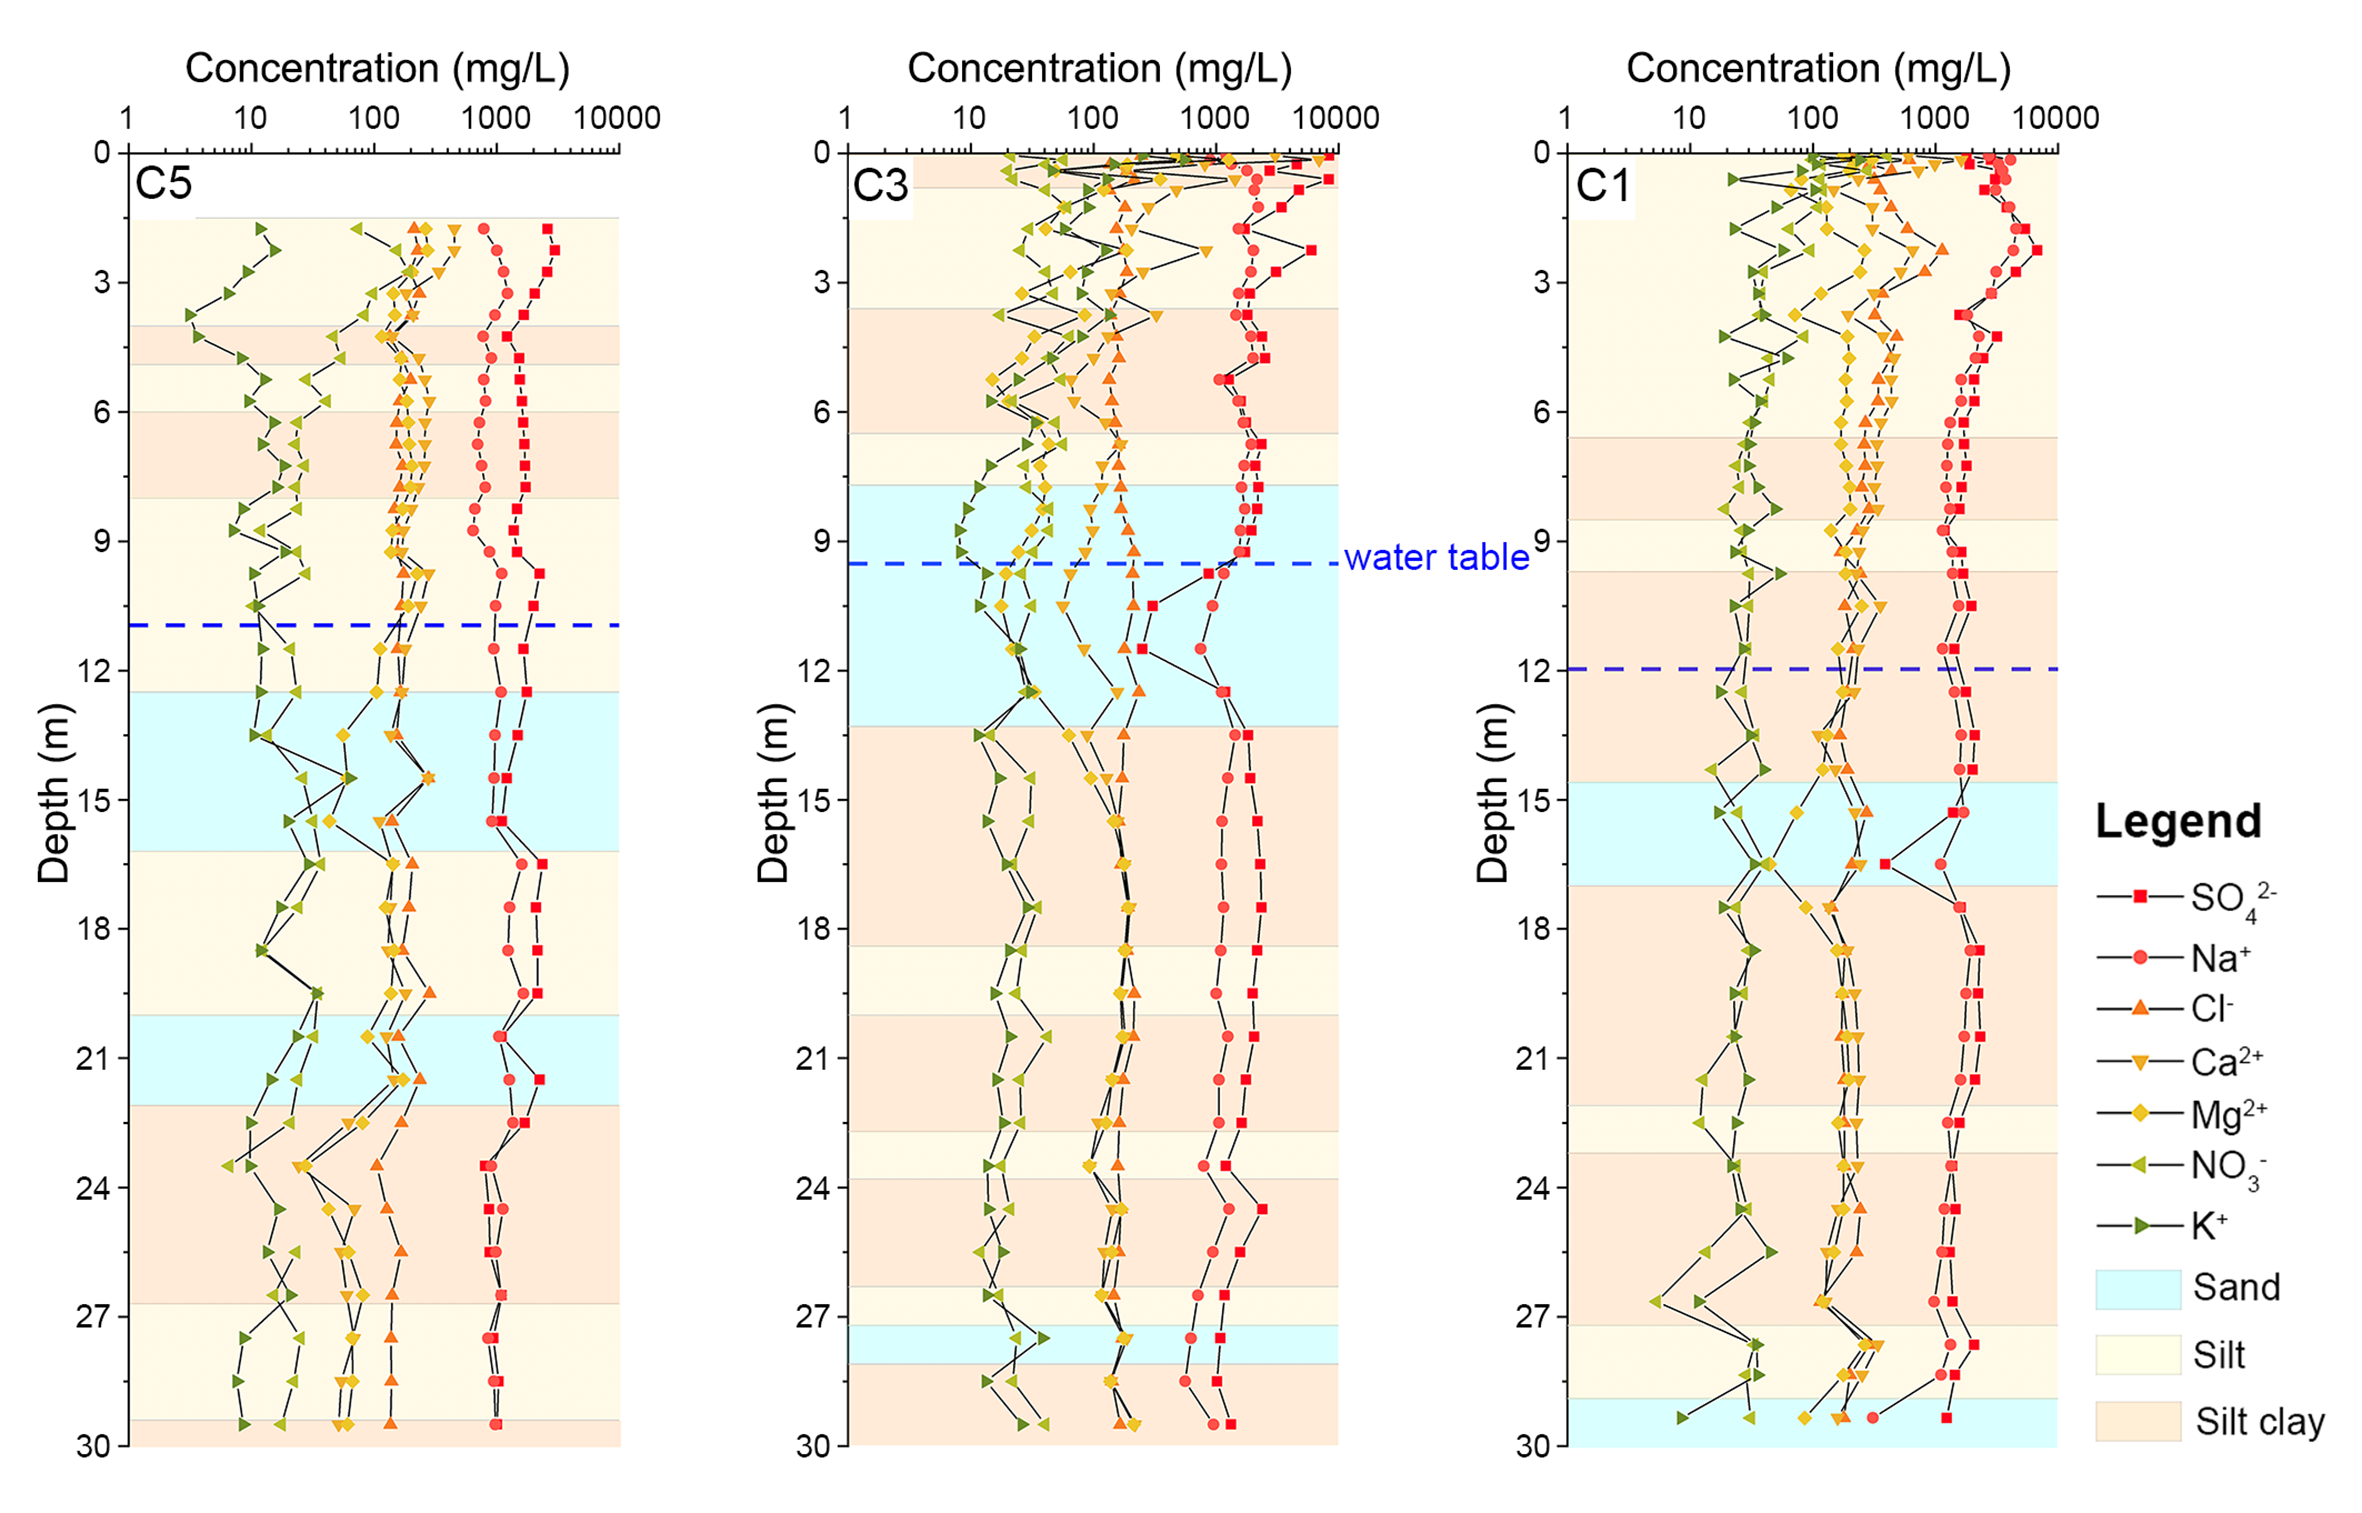

Supplement: Supplementary file 2 [file hess-2022-391-supplement.zip › Figures/Figure S3.tif]

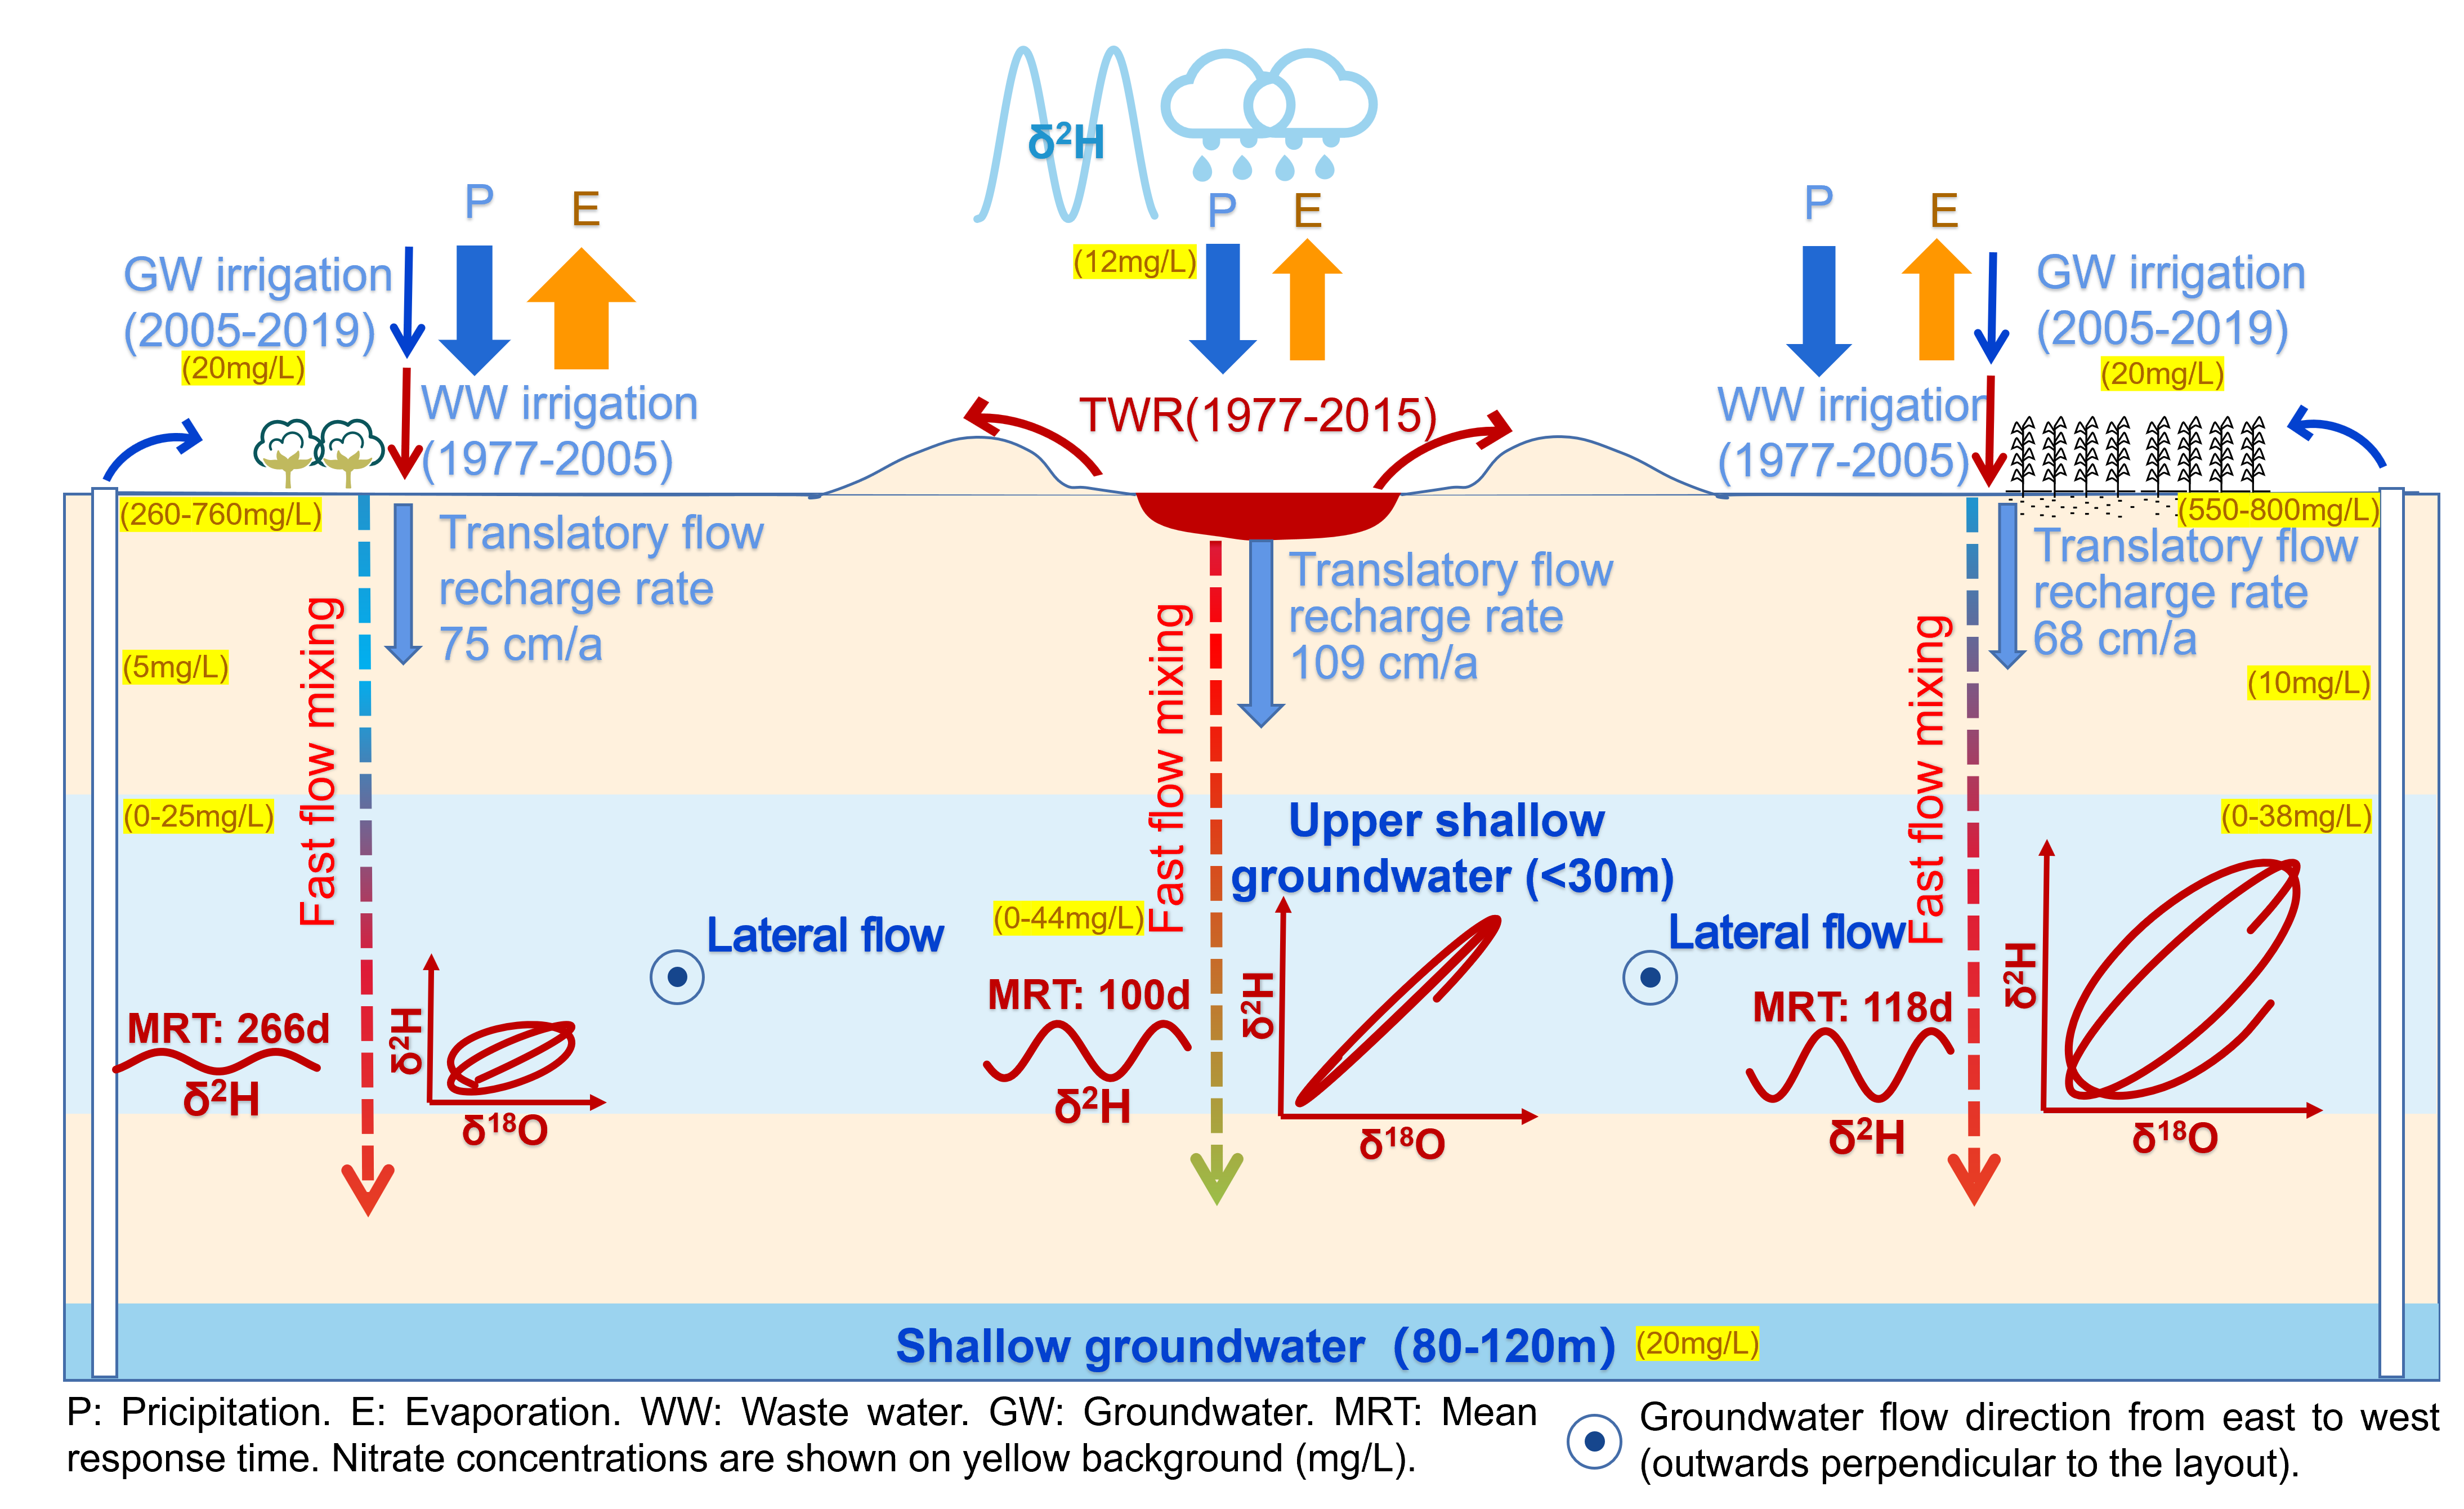

Supplement: Supplementary file 2 [file hess-2022-391-supplement.zip › Figures/Figure12.png]

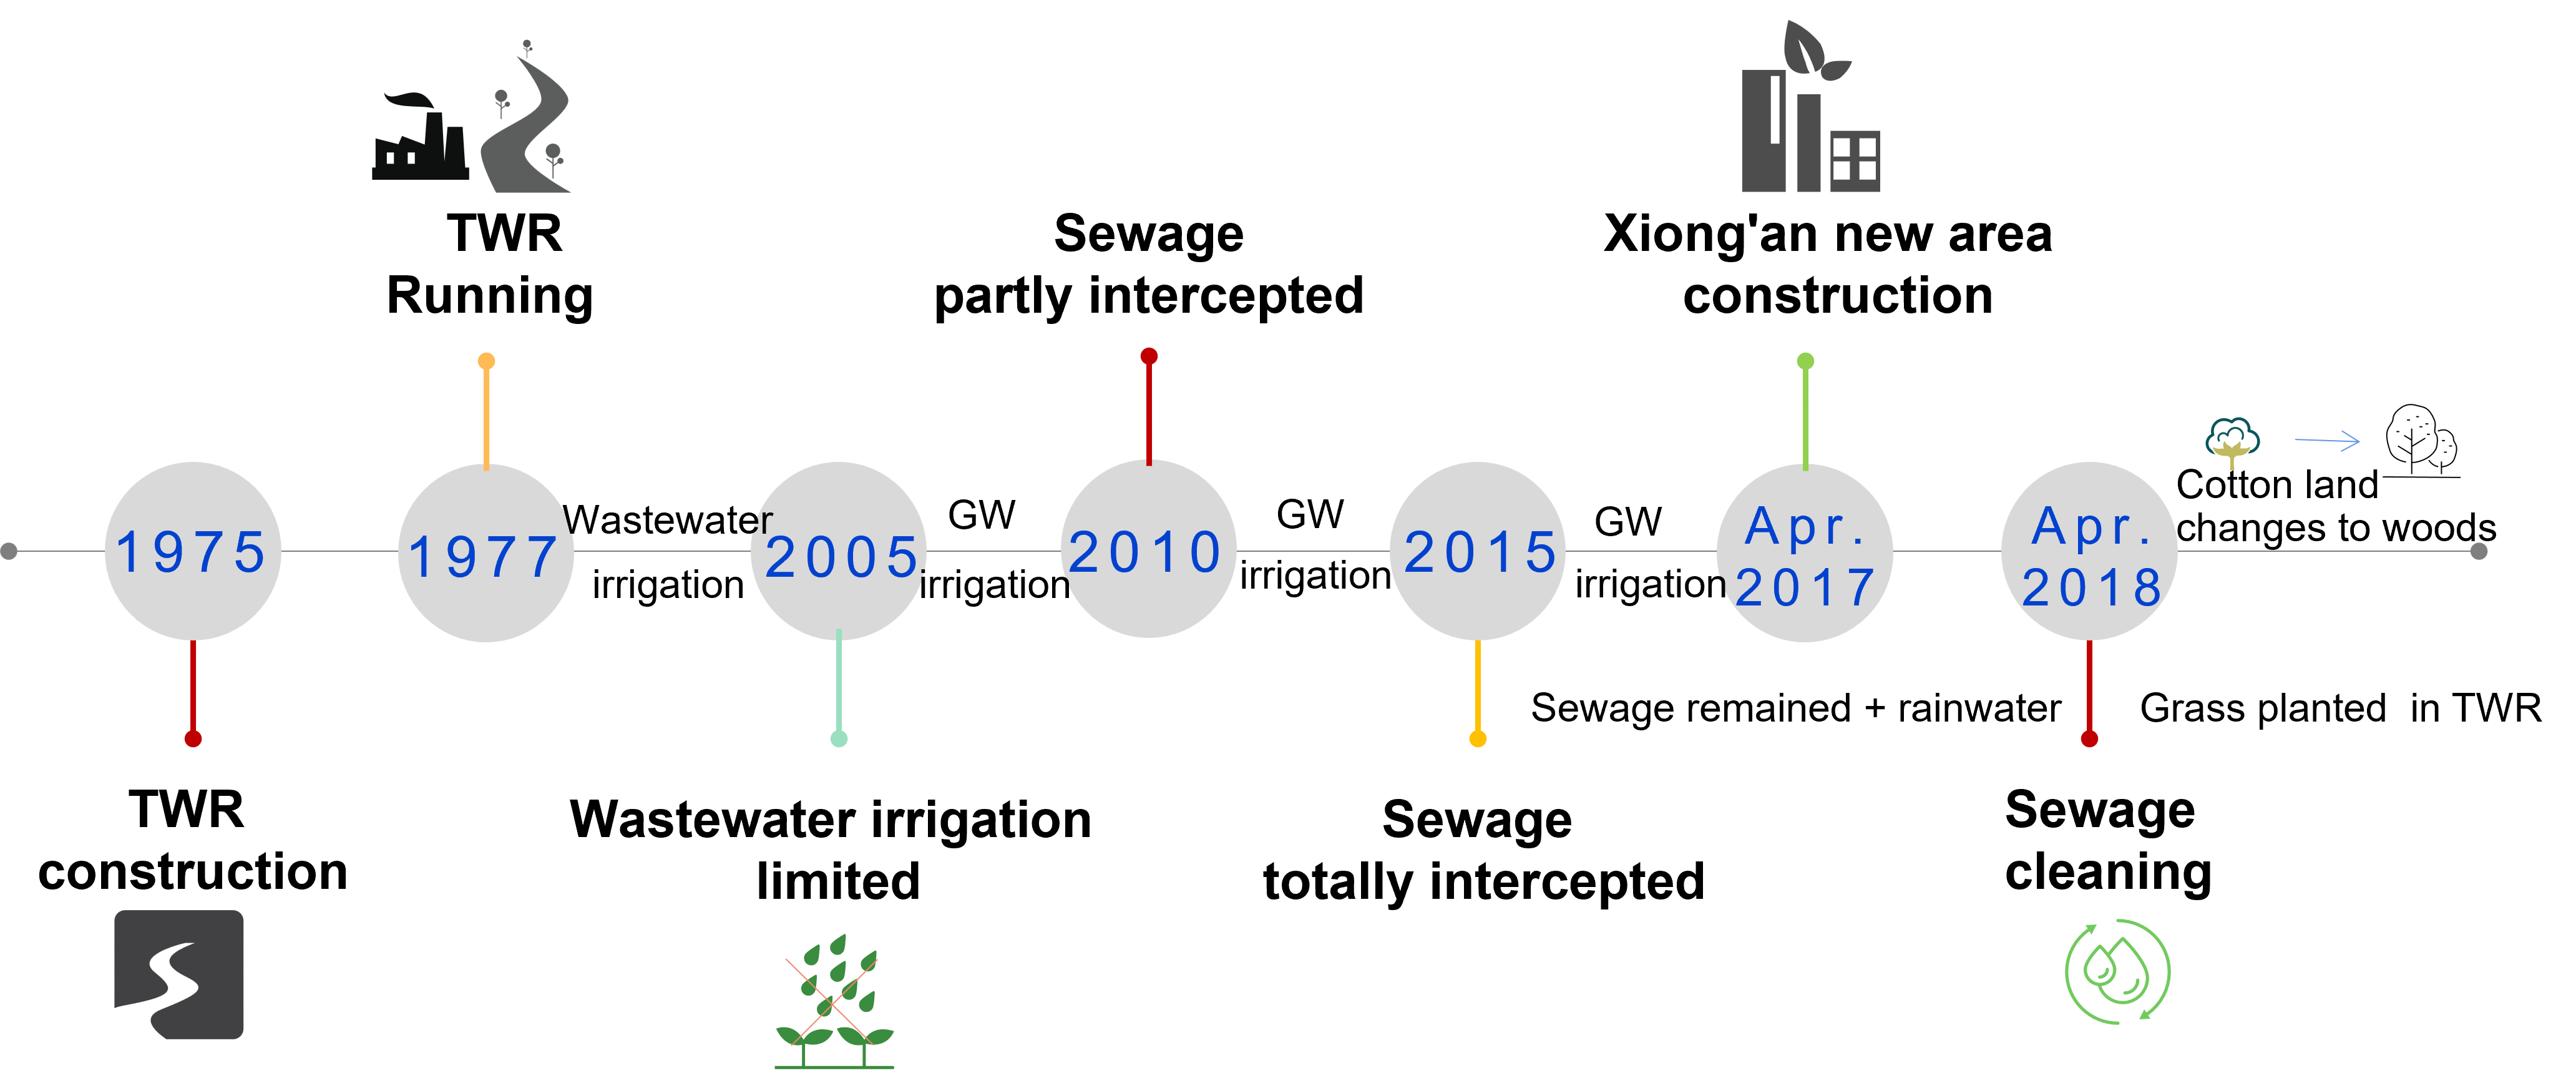

Supplement: Supplementary file 2 [file hess-2022-391-supplement.zip › Figures/Figure2.png]
